# Supplementary material for: Conferring DNA virus resistance with high specificity in plants using virus-inducible genome-editing system
Source: PubMed Central journal article supplement (PMC6238286; doi:10.1186/s13059-018-1580-4), 2018-11-15
Supplement: 13059_2018_1580_MOESM1_ESM.pdf [file 13059_2018_1580_MOESM1_ESM.pdf]

a

pV86 promoter

```
ATTGAATCGGGCTCTCTCAAATCCCCTATCAATTGGGTGCTTTGGGTGCTCTTAAATACCACCAAGGGGCC
ATCCGCATTAATATTACCGGATGGCCCCAAAAAATACGTGGCCAATGAAAATATGCCACGTGGAAAGCTA
AAGATGTTGATGTGATGGATTGGGCGGGAAACTTCCTGAAGAAGTTTCATTCCCGCCCCTTTTTTGGACT
TAGTCAAAAAAGTAGCCGACATACTGTTTCAAATAAAGTTAAAAGTAGATCATTGTGGTCCCCACAAGAAA
CTTGCTAAGCAAGTTTCGAATTATTTCTGTTTAAATACGTATTTTTTACATGTATATGTACTTATAAATGATGGT
CTGTCTACCAGACTGGTTATTTTTGCTATTTATCTTCAGTATTCTCCTGCAATCAGGTACGAAC TTTATGGGA
CCTTCA
```

b

pC86 promoter

```
AGGAGCTGTTCTAAGGCGTCTTCTTTGGTTACTGAACATTGAGGGTATGTAAGGAAAAAATTTTTGGCTTT
TTTGAAAAAGGCATATTGAATCGGGCTCTCTCAAATCCCCTATCAATTGGGTGCTTTGGGTGCTCTTAAA
TACCACCAAGGGGCCATCCGCATTAATATTACCGGATGGCCCCAAAAAATACGTGGCCAATGAAAATAT
GCCACGTGGAAAGCTAAAGATGTTGATGTGATGGATTGGGCGGGAAACTTCCTGAAGAAGTTTCATTTC
CCGCCCTTTTTTGGACTTAGTCAAAAAAGTAGCCGACATACTGTTTCAAATAAAGTTAAAAGTAGATCAT
TGTGGTCCCCACAAGAACTTGCTAAGCAAGTTTCGAATTATTTCTGTTTAAATACGTTATTTTTACATGTA
TATGTACTTATAAATG
```

**Figure S1.** DNA sequences of the pV86 and pC86 promoters used in this study. The pV86 promoter is colored in black (a) and the pC86 promoter in orange (b).

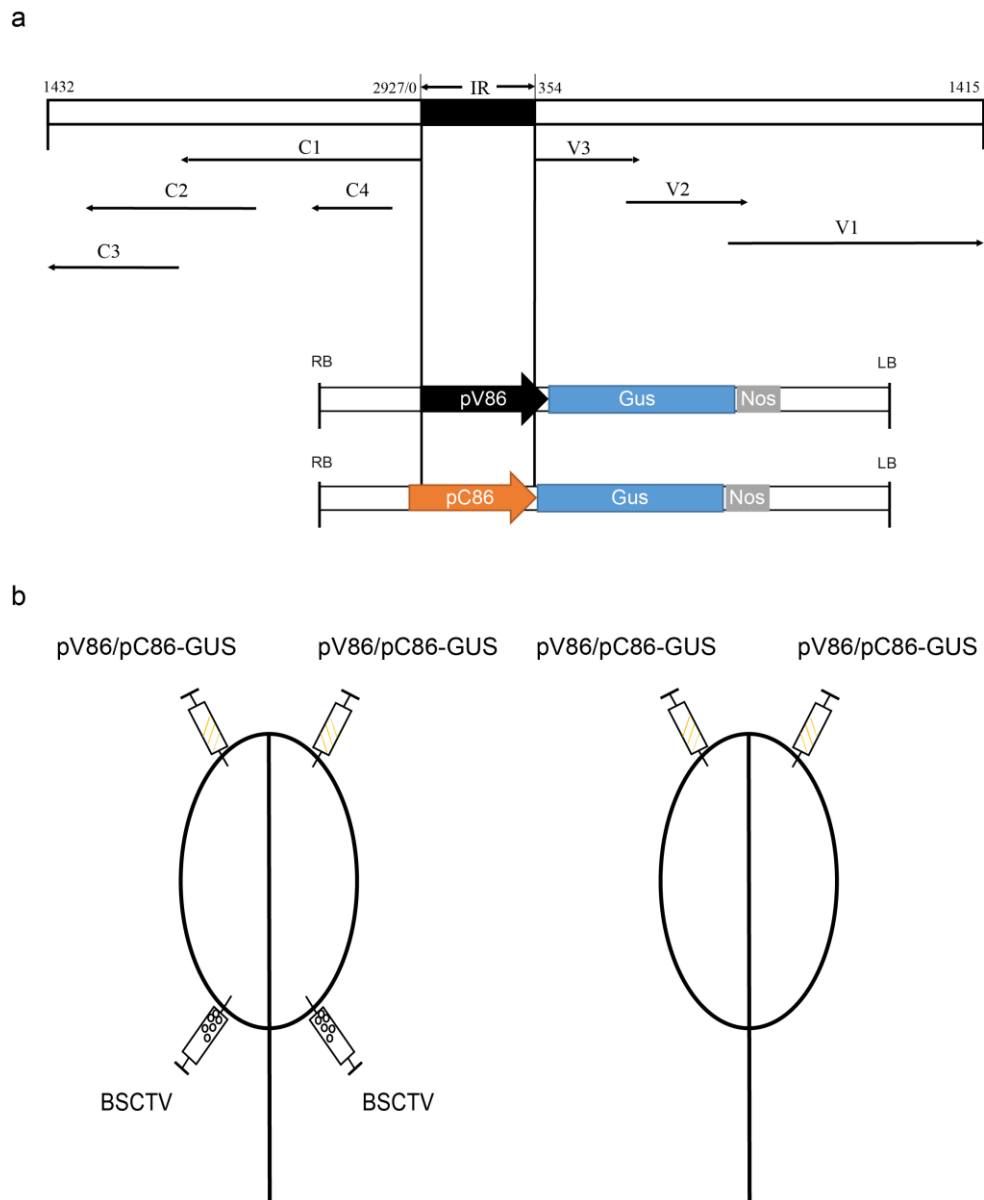

**Figure S2.** Diagram of the transient system used to test the inducible activities of the pV86 and pC86 promoters. (a) GUS reporter constructs based on the pV86 and pC86 promoters. The intergenic region of the BSCTV genome is indicated by a black box, and open boxes are coding regions. Open reading frames are indicated by solid arrows, and numbers indicate nucleotide positions in the BSCTV genomes. The pV86 promoter contains the intergenic region with an additional 86 bp of the V3 coding region while the pC86 promoter contains the intergenic region with an additional 86 bp of the 5' upstream region. (b) Strategy for testing the GUS reporter systems. Thirty-day-old *N. benthamiana* plants with between 6 and 8 true leaves were used.

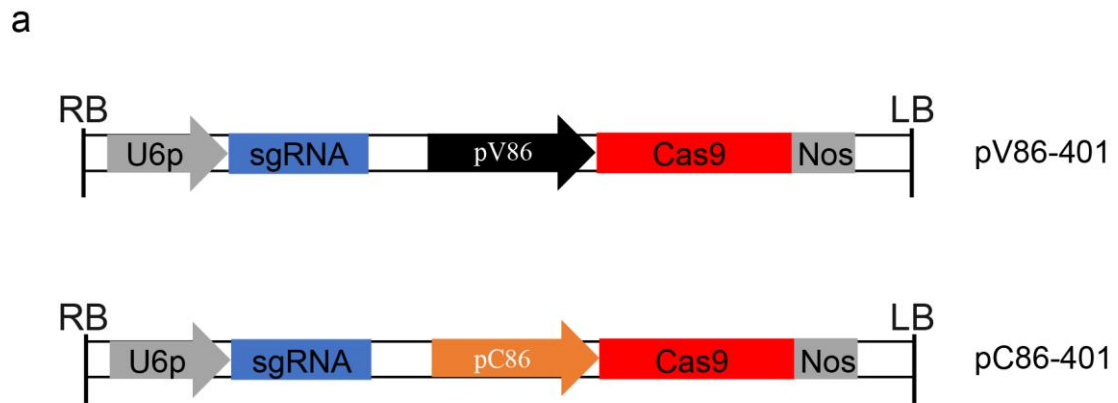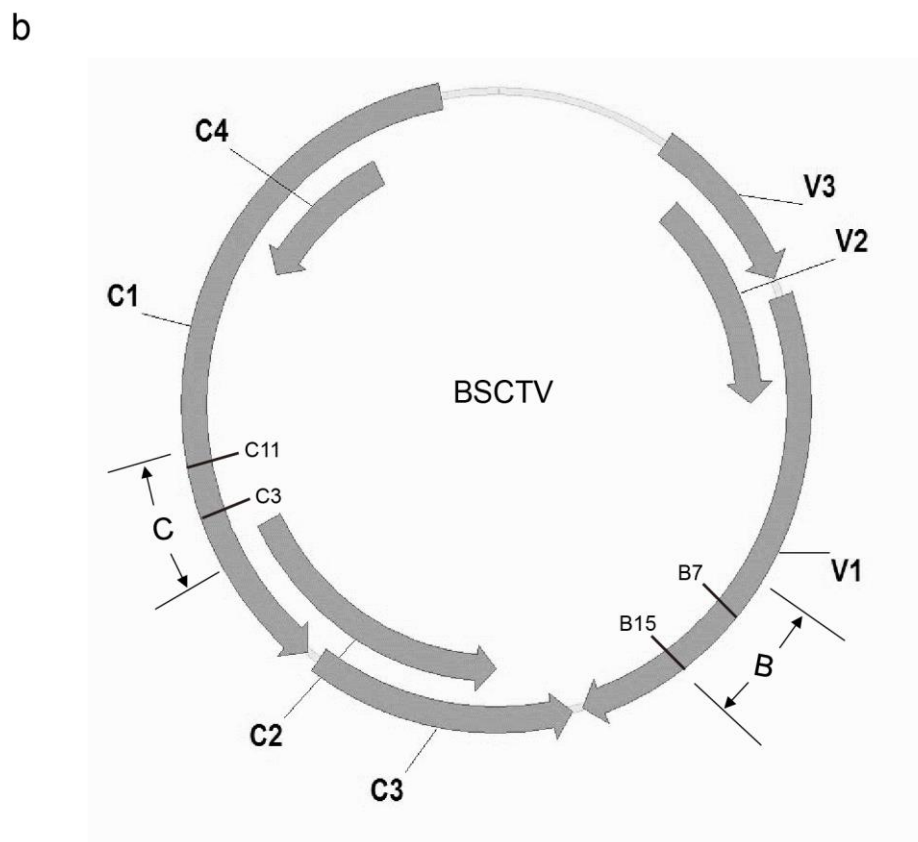

**Figure S3.** Constructs for the two BSCTV-inducible systems. The sgRNA is driven by the AtU6 promoter and Cas9 by the pV86 (black) or pC86 promoter (orange) (a). sgRNAs B7 and B15 are located in the V1 open reading frame and C3 and C11 in the C1 open reading frame (b).

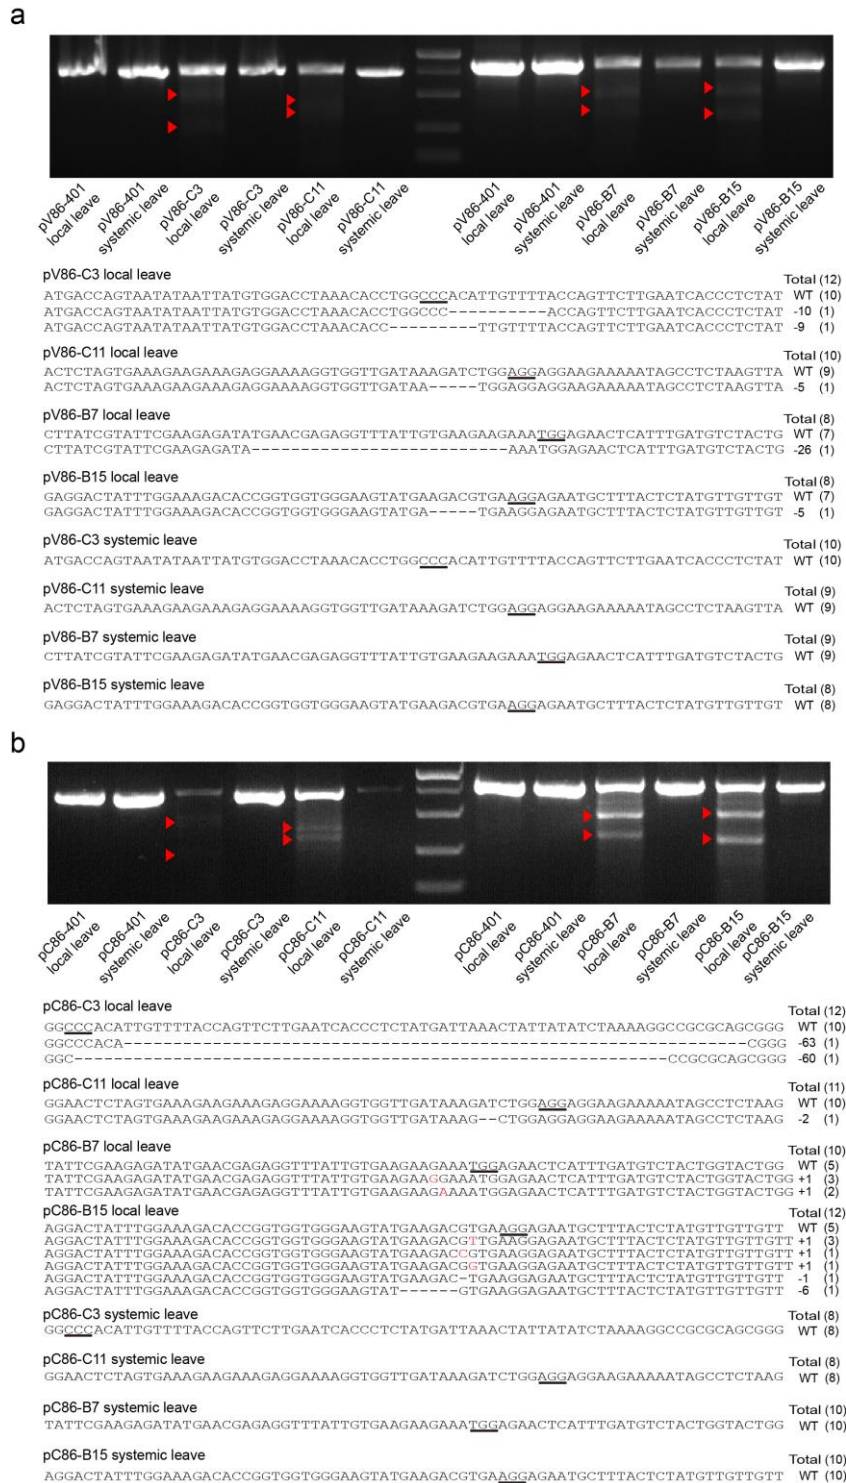

**Figure S4.** Mutations induced in the BSCTV genome by the inducible pV86-401 (a) and pC86-401 (b) constructs. Red arrowheads indicate fragments generated by T7E1. -/+ indicates deletions/insertions of nucleotides. The number to the right of each row indicate numbers of independent plasmid clones found after cloning and sequencing of PCR amplicons. For systemic leaves, a second round PCR was performed to amplify the rare virus.

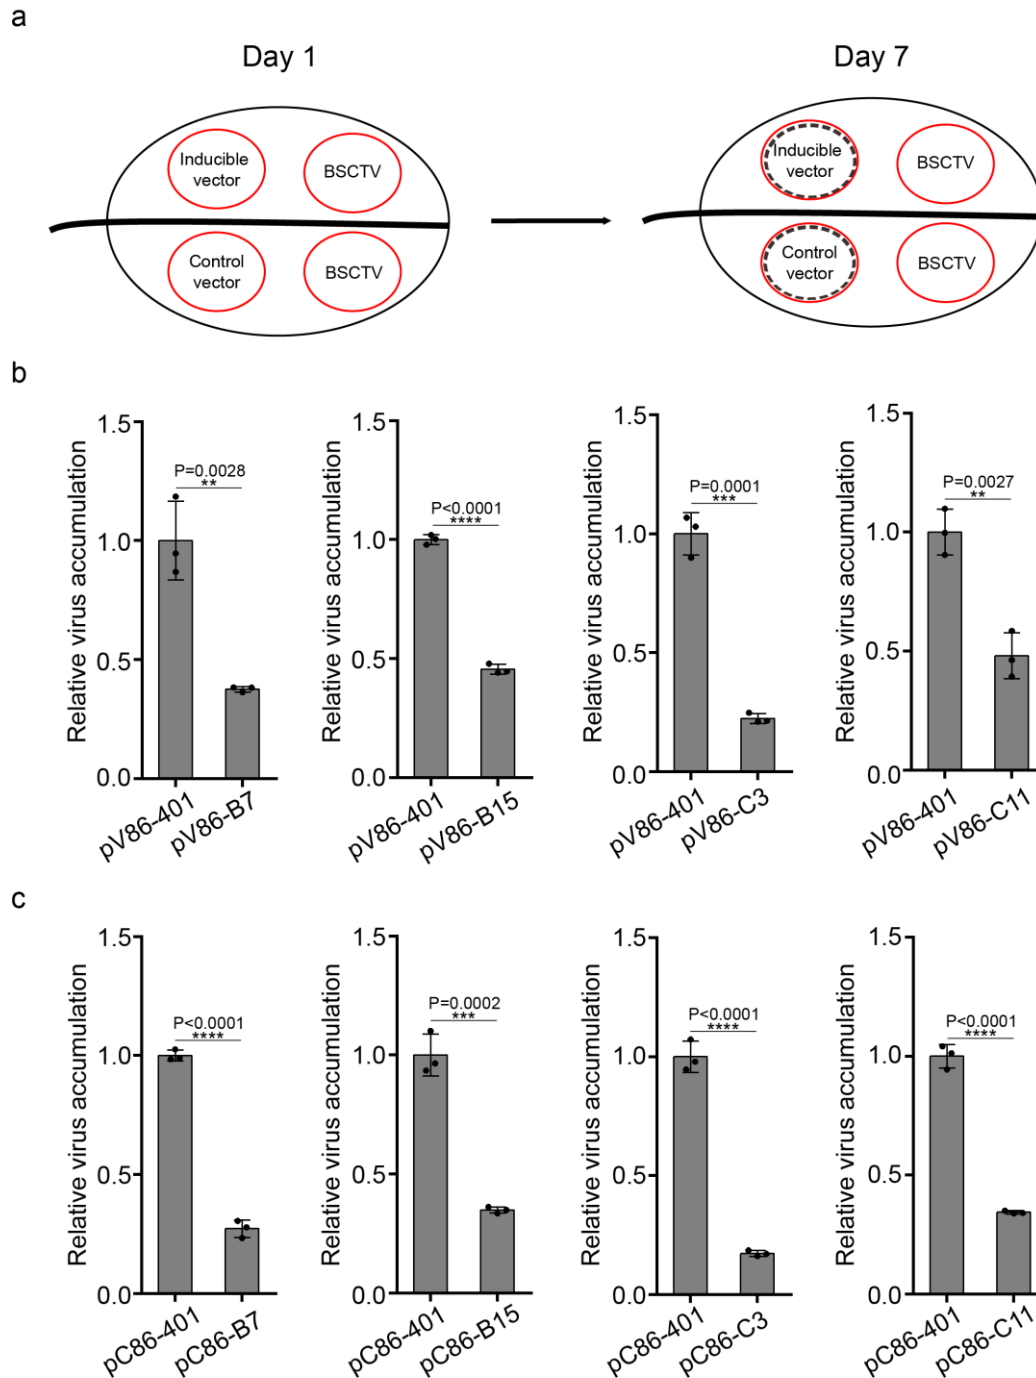

**Figure S5.** qPCR analysis of the sensitivity and efficiency of the inducible pV86-401 (b) and pC86-401 (c) combinations for inhibiting virus replication ( $n = 3$ ) in *N. benthamiana* plants. (a) Strategy for testing whether the inducible CRISPR/Cas9 system reduced the amount of replicating virus. The DNA in the bottom regions (marked by dashed lines) was extracted and viral accumulation was measured by qPCR. All values represent means  $\pm$  S.D. \*\* $P < 0.01$ , \*\*\* $P < 0.001$ , \*\*\*\* $P < 0.0001$ ; two-tailed Student's t-test.

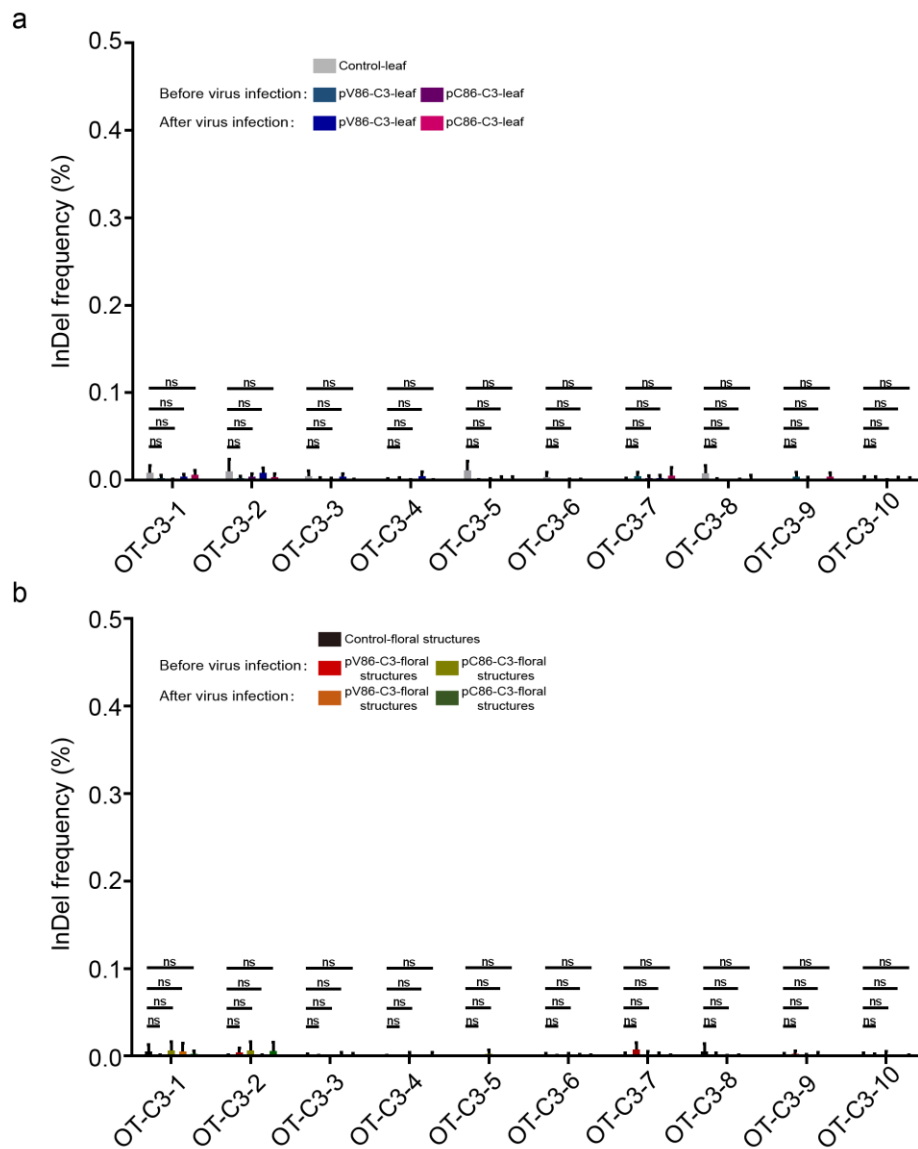

**Figure S6.** Indel frequencies at ten candidate sites in the leaves (a) and floral structures (b) of transgenic pV86-C3 and pC86-C3 *Arabidopsis* plants were similar to the frequencies in non-transgenic control *Arabidopsis* plants (n = 3). All values represent means  $\pm$  S.D. ns, not significant by two-tailed Student's t-test.

**Table S1.** Potential off-target sites for C3 sgRNA in *Arabidopsis*.

| sgRNA ID | Mismatches | Off-target sequence <sup>a</sup> | Chromosome | Position | Direction |
|----------|------------|----------------------------------|------------|----------|-----------|
| C3       | 0          | <u>CCCACATTGTTTTACCAGTTCTT</u>   |            |          |           |
| OT-C3-1  | 3          | AAGtAaTGGTAAgACAATGT <u>CGG</u>  | chr4       | 15495282 | +         |
| OT-C3-2  | 3          | AAGAAaTGGTgAAACAgTGTA <u>AAG</u> | chr1       | 2064439  | -         |
| OT-C3-3  | 3          | AAGAACatGTAAAACAATGa <u>AAG</u>  | chr3       | 7075914  | +         |
| OT-C3-4  | 4          | AAGgAaaGaTAAAACAATGT <u>CAG</u>  | chr5       | 20031389 | +         |
| OT-C3-5  | 4          | AAGtAtTcGTcAAACAATGTT <u>TGG</u> | chr3       | 17560887 | +         |
| OT-C3-6  | 4          | tAGAAaTGGatAAACAATGT <u>AAG</u>  | chr3       | 22066699 | +         |
| OT-C3-7  | 4          | AAGAgCTcGTAtAAaAATGT <u>AGG</u>  | chr4       | 12148731 | +         |
| OT-C3-8  | 4          | AAaAACTaGTgAAACcATGT <u>GGG</u>  | chr3       | 4078517  | -         |
| OT-C3-9  | 4          | AgGAACaGGaAAAACAATGg <u>CGG</u>  | chr3       | 694395   | +         |
| OT-C3-10 | 4          | AAGAAagGGaAAAACAATGg <u>CGG</u>  | chr3       | 4712965  | -         |

<sup>a</sup>The mismatch bases in the ten potential off-target sites are shown as lower case letters. The PAM motif is underlined.

**Table S2.** Indel frequencies detected by deep sequencing of transgenic C3 and control *Arabidopsis* plants.

| Material for deep sequencing | Off-target site | Independent experiment repeat | InDel reads | Total reads | InDel frequency (%) | Primers and bar codes <sup>a</sup>                                       |
|------------------------------|-----------------|-------------------------------|-------------|-------------|---------------------|--------------------------------------------------------------------------|
| C3                           | OT-C3-1         | R1                            | 4           | 16105       | 0.0248              | F: <b>GACTAGTA</b> TTGCTTTATGTGTGTCTTGGTTTT<br>R: CAATCTGAACCGTCCAAACTTC |
|                              |                 | R2                            | 13          | 71363       | 0.0182              | F: <b>GTTTCG</b> TTGCTTTATGTGTGTCTTGGTTTT<br>R: CAATCTGAACCGTCCAAACTTC   |
|                              |                 | R3                            | 11          | 67640       | 0.0163              | F: <b>AACGTGAT</b> TTGCTTTATGTGTGTCTTGGTTTT<br>R: CAATCTGAACCGTCCAAACTTC |
|                              | OT-C3-2         | R1                            | 138         | 199216      | 0.0693              | F: <b>TTAGGC</b> ATAGATACTCATACCGCTTC<br>R: GTTAGTGAATGTGAATTTGCTTTT     |
|                              |                 | R2                            | 91          | 67036       | 0.1357              | F: <b>CGTACG</b> ATAGATACTCATACCGCTTC<br>R: GTTAGTGAATGTGAATTTGCTTTT     |
|                              |                 | R3                            | 78          | 93577       | 0.0834              | F: <b>AAACATCG</b> ATAGATACTCATACCGCTTC<br>R: GTTAGTGAATGTGAATTTGCTTTT   |
|                              | OT-C3-3         | R1                            | 157         | 785808      | 0.02                | F: <b>ACAGTG</b> CTCCATATACCCTCATTAGC<br>R: GTTGTCTGAATAAGGCTGACCAAG     |
|                              |                 | R2                            | 19          | 53449       | 0.0355              | F: <b>ACTATGCA</b> CTCCATATACCCTCATTAGC<br>R: GTTGTCTGAATAAGGCTGACCAAG   |
|                              |                 | R3                            | 10          | 54059       | 0.0185              | F: <b>GAGTGG</b> CTCCATATACCCTCATTAGC<br>R: GTTGTCTGAATAAGGCTGACCAAG     |
|                              | OT-C3-4         | R1                            | 32          | 507149      | 0.0063              | F: <b>CAGATC</b> GAGTAGATGGCAGGAGAAAA<br>R: CTCATAAGTCCAATGCCAG          |
|                              |                 | R2                            | 4           | 67557       | 0.0059              | F: <b>GGTAGC</b> GAGTAGATGGCAGGAGAAAA<br>R: CTCATAAGTCCAATGCCAG          |
|                              |                 | R3                            | 9           | 83131       | 0.0108              | F: <b>AGAGTCA</b> AGAGTAGATGGCAGGAGAAAA<br>R: CTCATAAGTCCAATGCCAG        |
|                              | OT-C3-5         | R1                            | 47          | 317358      | 0.0148              | F: <b>GATCAG</b> TTCTTCTGATAGTGTCCTG<br>R: CACTTAAAAAACGTAATGTTAC        |
|                              |                 | R2                            | 8           | 39011       | 0.0205              | F: <b>ACCACTGT</b> TTCTTCTGATAGTGTCCTG<br>R: CACTTAAAAAACGTAATGTTAC      |
|                              |                 | R3                            | 9           | 49055       | 0.0183              | F: <b>AGATCGCA</b> TTCTTCTGATAGTGTCCTG<br>R: CACTTAAAAAACGTAATGTTAC      |
|                              | OT-C3-6         | R1                            | 136         | 468604      | 0.029               | F: <b>GGCTAC</b> GCTTCTTATCTTTTCTAC<br>R: CTTTTTTTTTCTGTAGACC            |
|                              |                 | R2                            | 11          | 52655       | 0.0209              | F: <b>ATGAGC</b> GCTTCTTATCTTTTCTAC<br>R: CTTTTTTTTTCTGTAGACC            |
|                              |                 | R3                            | 5           | 44668       | 0.0112              | F: <b>ACATTGGC</b> GCTTCTTATCTTTTCTAC<br>R: CTTTTTTTTTCTGTAGACC          |



|    |          |    |      |        |        |                                                                        |
|----|----------|----|------|--------|--------|------------------------------------------------------------------------|
|    | OT-C3-7  | R1 | 861  | 454453 | 0.1895 | F: <b>AGTCAA</b> GTGTAGTGGAAGAGAGCTGG<br>R: ATGTATGTGTAAATTGTGAG       |
|    |          | R2 | 136  | 81295  | 0.1673 | F: <b>ATTCT</b> GTGTAGTGGAAGAGAGCTGG<br>R: ATGTATGTGTAAATTGTGAG        |
|    |          | R3 | 125  | 62347  | 0.2005 | F: <b>CAGATCTG</b> GTGTAGTGGAAGAGAGCTGG<br>R: ATGTATGTGTAAATTGTGAG     |
|    | OT-C3-8  | R1 | 4089 | 343576 | 1.1901 | F: <b>ATGTCA</b> ATATAATACTGTATTGGGCTTGG<br>R: GTTACCTTTAGCTTCTCTAG    |
|    |          | R2 | 426  | 114944 | 0.3706 | F: <b>CCGTGAGA</b> ATATAATACTGTATTGGGCTTGG<br>R: GTTACCTTTAGCTTCTCTAG  |
|    |          | R3 | 102  | 15547  | 0.6561 | F: <b>GAGCTGAA</b> ATATAATACTGTATTGGGCTTGG<br>R: GTTACCTTTAGCTTCTCTAG  |
|    | OT-C3-9  | R1 | 3    | 22686  | 0.0132 | F: <b>CAACTA</b> TAGCTACCTCAACCGCCAAC<br>R: TCCATGGTCTATTTGGGTGTC      |
|    |          | R2 | 14   | 59188  | 0.0237 | F: <b>CAACTA</b> TAGCTACCTCAACCGCCAAC<br>R: TCCATGGTCTATTTGGGTGTC      |
|    |          | R3 | 5    | 34090  | 0.0147 | F: <b>GATAGACA</b> TAGCTACCTCAACCGCCAAC<br>R: TCCATGGTCTATTTGGGTGTC    |
|    | OT-C3-10 | R1 | 3    | 21935  | 0.0137 | F: <b>CACCGG</b> TGAAACCACTTCAAACCTCTCC<br>R: TTGTTTGACGACGACGTTTC     |
|    |          | R2 | 9    | 38525  | 0.0234 | F: <b>CACCGG</b> TGAAACCACTTCAAACCTCTCC<br>R: TTGTTTGACGACGACGTTTC     |
|    |          | R3 | 7    | 51520  | 0.0136 | F: <b>ACAAGCTA</b> TGAAACCACTTCAAACCTCTCC<br>R: TTGTTTGACGACGACGTTTC   |
| WT | OT-C3-1  | R1 | 0    | 49387  | 0      | F: <b>ATCACG</b> TTGCTTTATGTGTGTCTTGGTTTT<br>R: CAATCTGAACCGTCCAAACTTC |
|    |          | R2 | 1    | 189825 | 0.0005 | F: <b>ATCACG</b> TTGCTTTATGTGTGTCTTGGTTTT<br>R: CAATCTGAACCGTCCAAACTTC |
|    |          | R3 | 10   | 252449 | 0.004  | F: <b>GTTTCG</b> TTGCTTTATGTGTGTCTTGGTTTT<br>R: CAATCTGAACCGTCCAAACTTC |
|    | OT-C3-2  | R1 | 12   | 81718  | 0.0147 | F: <b>CGATGT</b> ATAGATACTCATACCGCTTC<br>R: GTTAGTGAATGTGAATTTGCTTTT   |
|    |          | R2 | 5    | 247317 | 0.002  | F: <b>CGATGT</b> ATAGATACTCATACCGCTTC<br>R: GTTAGTGAATGTGAATTTGCTTTT   |
|    |          | R3 | 5    | 236444 | 0.0021 | F: <b>CGTACG</b> ATAGATACTCATACCGCTTC<br>R: GTTAGTGAATGTGAATTTGCTTTT   |
|    | OT-C3-3  | R1 | 0    | 39082  | 0      | F: <b>TTAGGC</b> CTCCATATACCCTCATTAGC<br>R: GTTGTCTGAATAAGGCTGACCAAG   |
|    |          | R2 | 0    | 55577  | 0      | F: <b>TTAGGC</b> CTCCATATACCCTCATTAGC<br>R: GTTGTCTGAATAAGGCTGACCAAG   |
|    |          | R3 | 0    | 104611 | 0      | F: <b>GAGTGG</b> CTCCATATACCCTCATTAGC<br>R: GTTGTCTGAATAAGGCTGACCAAG   |
|    | OT-C3-4  | R1 | 3    | 55938  | 0.0054 | F: <b>TGACCA</b> GAGTAGATGGCAGGAGAAAA<br>R: CTCATAAGTCCAATGCCAG        |

|  |          |    |    |        |        |                                                                       |
|--|----------|----|----|--------|--------|-----------------------------------------------------------------------|
|  |          | R2 | 0  | 81201  | 0      | F: <b>TGACCA</b> GAGTAGATGGCAGGAGAAAA<br>R: CTCATAAGTCCAATGCCAG       |
|  |          | R3 | 0  | 194981 | 0      | F: <b>GGTAGC</b> GAGTAGATGGCAGGAGAAAA<br>R: CTCATAAGTCCAATGCCAG       |
|  | OT-C3-5  | R1 | 0  | 36204  | 0      | F: <b>ACAGTG</b> TTCTTCTGATAGTGCACTG<br>R: CACTTAAAAAACGTAATGTTAC     |
|  |          | R2 | 0  | 112484 | 0      | F: <b>ACAGTG</b> TTCTTCTGATAGTGCACTG<br>R: CACTTAAAAAACGTAATGTTAC     |
|  |          | R3 | 0  | 113921 | 0      | F: <b>ACTGAT</b> TTCTTCTGATAGTGCACTG<br>R: CACTTAAAAAACGTAATGTTAC     |
|  | OT-C3-6  | R1 | 0  | 18565  | 0      | F: <b>TAATCG</b> GCTTCTCTTATCTTTTCTAC<br>R: CTTTTTTTTTCTGTAGACC       |
|  |          | R2 | 9  | 64017  | 0.0141 | F: <b>TAATCG</b> GCTTCTCTTATCTTTTCTAC<br>R: CTTTTTTTTTCTGTAGACC       |
|  |          | R3 | 0  | 1654   | 0      | F: <b>ATGAGC</b> GCTTCTCTTATCTTTTCTAC<br>R: CTTTTTTTTTCTGTAGACC       |
|  | OT-C3-7  | R1 | 0  | 137351 | 0      | F: <b>CAGATC</b> GTGTAGTGGAAGAGAGCTGG<br>R: ATGTATGTGTAATTGTGAG       |
|  |          | R2 | 18 | 218972 | 0.0082 | F: <b>CAGATC</b> GTGTAGTGGAAGAGAGCTGG<br>R: ATGTATGTGTAATTGTGAG       |
|  |          | R3 | 24 | 302896 | 0.0079 | F: <b>ATTCCT</b> GTGTAGTGGAAGAGAGCTGG<br>R: ATGTATGTGTAATTGTGAG       |
|  | OT-C3-8  | R1 | 0  | 155851 | 0      | F: <b>GAGCTGAA</b> ATATAATACTGTATTGGGCTTGG<br>R: GTTACCTTTAGCTTCTCTAG |
|  |          | R2 | 17 | 204649 | 0.0083 | F: <b>ACTTGA</b> ATATAATACTGTATTGGGCTTGG<br>R: GTTACCTTTAGCTTCTCTAG   |
|  |          | R3 | 19 | 143249 | 0.0133 | F: <b>CAAAAG</b> ATATAATACTGTATTGGGCTTGG<br>R: GTTACCTTTAGCTTCTCTAG   |
|  | OT-C3-9  | R1 | 2  | 24927  | 0.008  | F: <b>GATCAG</b> TAGCTACCTCAACCGCCAAC<br>R: TCCATGGTCTATTTGGGTGTC     |
|  |          | R2 | 3  | 93319  | 0.0032 | F: <b>GATCAG</b> TAGCTACCTCAACCGCCAAC<br>R: TCCATGGTCTATTTGGGTGTC     |
|  |          | R3 | 1  | 65265  | 0.0015 | F: <b>CAACTA</b> TAGCTACCTCAACCGCCAAC<br>R: TCCATGGTCTATTTGGGTGTC     |
|  | OT-C3-10 | R1 | 1  | 26248  | 0.0038 | F: <b>TACAGC</b> TGAAACCACTTCAAACCTCTCC<br>R: TTGTTTGACGACGACGTTTC    |
|  |          | R2 | 0  | 38128  | 0      | F: <b>TACAGC</b> TGAAACCACTTCAAACCTCTCC<br>R: TTGTTTGACGACGACGTTTC    |
|  |          | R3 | 0  | 88703  | 0      | F: <b>CACCGT</b> GAAACCACTTCAAACCTCTCC<br>R: TTGTTTGACGACGACGTTTC     |

<sup>a</sup>The barcodes used for deep sequencing are marked in red.

**Table S3.** Relative levels of virus accumulation for each of the four target sites in the inducible systems.

| Material used in qPCR analysis | ID       | Relative virus accumulation in each experimental repeat |        |        |
|--------------------------------|----------|---------------------------------------------------------|--------|--------|
|                                |          | 1                                                       | 2      | 3      |
| Local leaves                   | pV86-401 | 1.1942                                                  | 0.9556 | 0.8503 |
|                                | pV86-C3  | 0.2635                                                  | 0.0276 | 0.0722 |
|                                | pV86-C11 | 0.4098                                                  | 0.2551 | 0.5181 |
|                                | pV86-B7  | 0.0399                                                  | 0.2417 | 0.0533 |
|                                | pV86-B15 | 0.0439                                                  | 0.1488 | 0.2343 |
| Systemic leaves                | pV86-401 | 0.9932                                                  | 0.9125 | 1.0943 |
|                                | pV86-C3  | 0.0013                                                  | 0.0045 | 0.0017 |
|                                | pV86-C11 | 0.1476                                                  | 0.2707 | 0.2003 |
|                                | pV86-B7  | 0.0001                                                  | 0.0002 | 0.0002 |
|                                | pV86-B15 | 9E-05                                                   | 0.0001 | 0.0007 |
| Local leaves                   | pC86-401 | 1.1052                                                  | 0.8941 | 1.0007 |
|                                | pC86-C3  | 0.0149                                                  | 0.0307 | 0.0348 |
|                                | pC86-C11 | 0.0049                                                  | 0.0012 | 0.0071 |
|                                | pC86-B7  | 0.1846                                                  | 0.0191 | 0.104  |
|                                | pC86-B15 | 0.0452                                                  | 0.0997 | 0.1587 |
| Systemic leaves                | pC86-401 | 0.9089                                                  | 1.0631 | 1.0281 |
|                                | pC86-C3  | 0.0356                                                  | 0.0015 | 0.0003 |
|                                | pC86-C11 | 0.0078                                                  | 0.0182 | 0.0023 |
|                                | pC86-B7  | 0.0147                                                  | 0.0073 | 0.0005 |
|                                | pC86-B15 | 0.0048                                                  | 0.0157 | 0.0178 |

**Table S4.** The relative viral load detected from the experiment of inhibiting replicating virus.

| Group | ID       | Relative virus accumulation from each experiment repeat |        |        |
|-------|----------|---------------------------------------------------------|--------|--------|
|       |          | 1                                                       | 2      | 3      |
| 1     | pV86-401 | 0.8996                                                  | 1.0691 | 1.0312 |
|       | pV86-C3  | 0.2098                                                  | 0.2142 | 0.2483 |
| 2     | pV86-401 | 0.9043                                                  | 0.9977 | 1.098  |
|       | pV86-C11 | 0.4632                                                  | 0.3923 | 0.5839 |
| 3     | pV86-401 | 1.185                                                   | 0.946  | 0.8687 |
|       | pV86-B7  | 0.382                                                   | 0.3627 | 0.3836 |
| 4     | pV86-401 | 1.0192                                                  | 1.0026 | 0.9781 |
|       | pV86-B15 | 0.4407                                                  | 0.446  | 0.479  |
| 5     | pC86-401 | 0.947                                                   | 0.9793 | 1.0733 |
|       | pC86-C3  | 0.162                                                   | 0.1711 | 0.1856 |
| 6     | pC86-401 | 0.9448                                                  | 1.0132 | 1.042  |
|       | pC86-C11 | 0.3511                                                  | 0.3389 | 0.342  |
| 7     | pC86-401 | 0.9851                                                  | 0.9896 | 1.0253 |
|       | pC86-B7  | 0.3048                                                  | 0.2786 | 0.2329 |
| 8     | pC86-401 | 0.9654                                                  | 0.934  | 1.1006 |
|       | pC86-B15 | 0.3352                                                  | 0.3484 | 0.3606 |

**Table S5.** InDel frequencies detected by deep sequencing with their primers in transgenic pV86-C3, pC86-C3 and control *Arabidopsis* plants.

|                        | Material for deep sequencing | Off-target site | Independent experiment repeat | InDel reads | Total reads | InDel frequency | Primers and barcodes <sup>a</sup>                                       |
|------------------------|------------------------------|-----------------|-------------------------------|-------------|-------------|-----------------|-------------------------------------------------------------------------|
| Before virus infection | pV86-C3 leaf                 | OT-C3-1         | R1                            | 5           | 821295      | 6.09E-06        | F: <b>GTTTCG</b> TTGCTTTATGTGTGTCTTGTTTT<br>R: CAATCTGAACCGTCCAAACTTC   |
|                        |                              |                 | R2                            | 0           | 195521      | 0               | F: <b>GTTTCG</b> TTGCTTTATGTGTGTCTTGTTTT<br>R: CAATCTGAACCGTCCAAACTTC   |
|                        |                              |                 | R3                            | 5           | 86218       | 5.8E-05         | F: <b>ACGCTCG</b> ATTGCTTTATGTGTGTCTTGTTTT<br>R: CAATCTGAACCGTCCAAACTTC |
|                        |                              | OT-C3-2         | R1                            | 43          | 871531      | 4.93E-05        | F: <b>CGTACG</b> ATAGATACTCATACCGCTTC<br>R: GTTAGTGAATGTGAATTTGCTTTT    |
|                        |                              |                 | R2                            | 1           | 215289      | 4.64E-06        | F: <b>CGTACG</b> ATAGATACTCATACCGCTTC<br>R: GTTAGTGAATGTGAATTTGCTTTT    |
|                        |                              |                 | R3                            | 1           | 100114      | 9.99E-06        | F: <b>ACGTATCA</b> ATAGATACTCATACCGCTTC<br>R: GTTAGTGAATGTGAATTTGCTTTT  |
|                        |                              | OT-C3-3         | R1                            | 1           | 214992      | 4.65E-06        | F: <b>GAGTGG</b> CTCCATATACCCTCATTAGC<br>R: GTTGTCTGAATAAGGCTGACCAAG    |
|                        |                              |                 | R2                            | 3           | 101658      | 2.95E-05        | F: <b>GAGTGG</b> CTCCATATACCCTCATTAGC<br>R: GTTGTCTGAATAAGGCTGACCAAG    |
|                        |                              |                 | R3                            | 1           | 165140      | 6.06E-06        | F: <b>ACTATGCA</b> CTCCATATACCCTCATTAGC<br>R: GTTGTCTGAATAAGGCTGACCAAG  |
|                        |                              | OT-C3-4         | R1                            | 0           | 627550      | 0               | F: <b>GGTAGC</b> GAGTAGATGGCAGGAGAAAA<br>R: CTCATAAGTCCAATGCCAG         |
|                        |                              |                 | R2                            | 4           | 143803      | 2.78E-05        | F: <b>GGTAGC</b> GAGTAGATGGCAGGAGAAAA<br>R: CTCATAAGTCCAATGCCAG         |
|                        |                              |                 | R3                            | 0           | 132898      | 0               | F: <b>AGAGTCA</b> AGAGTAGATGGCAGGAGAAAA<br>R: CTCATAAGTCCAATGCCAG       |
|                        |                              | OT-C3-5         | R1                            | 1           | 252144      | 3.97E-06        | F: <b>ACTGAT</b> TTCTTCTGATAGTGTCACTG<br>R: CACTTAAAAAAACGTAATGTTAC     |
|                        |                              |                 | R2                            | 0           | 90957       | 0               | F: <b>ACTGAT</b> TTCTTCTGATAGTGTCACTG<br>R: CACTTAAAAAAACGTAATGTTAC     |
|                        |                              |                 | R3                            | 0           | 33649       | 0               | F: <b>AGATCGC</b> ATTCTTCTGATAGTGTCACTG<br>R: CACTTAAAAAAACGTAATGTTAC   |
|                        |                              | OT-C3-6         | R1                            | 0           | 175567      | 0               | F: <b>ATGAGC</b> GCTTCTTATCTTTTCTAC<br>R: CTTTTTTTTTCTGTAGACC           |
|                        |                              |                 | R2                            | 0           | 34403       | 0               | F: <b>ATGAGC</b> GCTTCTTATCTTTTCTAC<br>R: CTTTTTTTTTCTGTAGACC           |
|                        |                              |                 | R3                            | 0           | 117065      | 0               | F: <b>AGCAGGA</b> GCTTCTTATCTTTTCTAC<br>R: CTTTTTTTTTCTGTAGACC          |
|                        |                              | OT-C3-          | R1                            | 40          | 936141      | 4.27E-05        | F: <b>ATTCCT</b> GTGTAGTGGAAGAGAGCTGG                                   |

|  |                                 |          |         |    |        |          |                                                                        |                                                                          |
|--|---------------------------------|----------|---------|----|--------|----------|------------------------------------------------------------------------|--------------------------------------------------------------------------|
|  |                                 | 7        |         |    |        |          | R: ATGTATGTGTAAATTGTGAG                                                |                                                                          |
|  |                                 |          | R2      | 20 | 219013 | 9.13E-05 | F: <b>ATTCCT</b> GTGTAGTGGAAAGAGAGCTGG<br>R: ATGTATGTGTAAATTGTGAG      |                                                                          |
|  |                                 |          | R3      | 0  | 145886 | 0        | F: <b>AGTCACTA</b> GTGTAGTGGAAAGAGAGCTGG<br>R: ATGTATGTGTAAATTGTGAG    |                                                                          |
|  |                                 | OT-C3-8  | R1      | 0  | 247472 | 0        | F: <b>CAAAAG</b> ATATAATACTGTATTGGGCTTGG<br>R: GTTACCTTTAGCTTCTCTAG    |                                                                          |
|  |                                 |          | R2      | 2  | 112807 | 1.77E-05 | F: <b>CAAAAG</b> ATATAATACTGTATTGGGCTTGG<br>R: GTTACCTTTAGCTTCTCTAG    |                                                                          |
|  |                                 |          | R3      | 0  | 33343  | 0        | F: <b>ATCCTGTA</b> ATATAATACTGTATTGGGCTTGG<br>R: GTTACCTTTAGCTTCTCTAG  |                                                                          |
|  |                                 | OT-C3-9  | R1      | 2  | 134527 | 1.49E-05 | F: <b>CAACTA</b> TAGCTACCTCAACCGCCAAC<br>R: TCCATGGTCTATTTGGGTGTC      |                                                                          |
|  |                                 |          | R2      | 0  | 30261  | 0        | F: <b>CAACTA</b> TAGCTACCTCAACCGCCAAC<br>R: TCCATGGTCTATTTGGGTGTC      |                                                                          |
|  |                                 |          | R3      | 4  | 40807  | 9.8E-05  | F: <b>ATTGAGGA</b> TAGCTACCTCAACCGCCAAC<br>R: TCCATGGTCTATTTGGGTGTC    |                                                                          |
|  |                                 | OT-C3-10 | R1      | 3  | 75484  | 3.97E-05 | F: <b>CACCGG</b> TGAAACCACTTCAAACCTTCC<br>R: TTGTTTGACGACGACGTTTC      |                                                                          |
|  |                                 |          | R2      | 1  | 118095 | 8.47E-06 | F: <b>CACCGG</b> TGAAACCACTTCAAACCTTCC<br>R: TTGTTTGACGACGACGTTTC      |                                                                          |
|  |                                 |          | R3      | 0  | 107007 | 0        | F: <b>CAACCACA</b> TGAAACCACTTCAAACCTTCC<br>R: TTGTTTGACGACGACGTTTC    |                                                                          |
|  | pV86-C3<br>floral<br>structures | OT-C3-1  | R1      | 1  | 88779  | 1.13E-05 | F: <b>ATCACG</b> TTGCTTTATGTGTGTCTTGGTTTT<br>R: CAATCTGAACCGTCCAAACTTC |                                                                          |
|  |                                 |          |         | R2 | 1      | 153539   | 6.51E-06                                                               | F: <b>ATCACG</b> TTGCTTTATGTGTGTCTTGGTTTT<br>R: CAATCTGAACCGTCCAAACTTC   |
|  |                                 |          |         | R3 | 0      | 111371   | 0                                                                      | F: <b>AACGTGAT</b> TTGCTTTATGTGTGTCTTGGTTTT<br>R: CAATCTGAACCGTCCAAACTTC |
|  |                                 |          | OT-C3-2 | R1 | 45     | 1107572  | 4.06E-05                                                               | F: <b>CGATGT</b> ATAGATACTCATACCGCTTC<br>R: GTTAGTGAATGTGAATTTGCTTTT     |
|  |                                 |          |         | R2 | 1      | 11077    | 9.03E-05                                                               | F: <b>CGATGT</b> ATAGATACTCATACCGCTTC<br>R: GTTAGTGAATGTGAATTTGCTTTT     |
|  |                                 |          |         | R3 | 0      | 16914    | 0                                                                      | F: <b>AAACATCG</b> ATAGATACTCATACCGCTTC<br>R: GTTAGTGAATGTGAATTTGCTTTT   |
|  |                                 |          | OT-C3-3 | R1 | 1      | 119537   | 8.37E-06                                                               | F: <b>TTAGGC</b> TCCATATACCCCTCATTAGC<br>R: GTTGTTCTGAATAAGGCTGACCAAG    |
|  |                                 |          |         | R2 | 0      | 13802    | 0                                                                      | F: <b>TTAGGC</b> TCCATATACCCCTCATTAGC<br>R: GTTGTTCTGAATAAGGCTGACCAAG    |
|  |                                 |          |         | R3 | 10     | 135515   | 7.38E-05                                                               | F: <b>ATGCCTAA</b> CTCCATATACCCCTCATTAGC<br>R: GTTGTTCTGAATAAGGCTGACCAAG |
|  |                                 |          | OT-C3-4 | R1 | 1      | 374103   | 2.67E-06                                                               | F: <b>TGACCA</b> GAGTAGATGGCAGGAGAAAA<br>R: CTCATAAGTCCAATGCCAG          |

|  |              |          |    |    |        |          |                                                                          |
|--|--------------|----------|----|----|--------|----------|--------------------------------------------------------------------------|
|  |              |          | R2 | 0  | 154429 | 0        | F: <b>TGACCA</b> GAGTAGATGGCAGGAGAAAA<br>R: CTCATAAGTCCAATGCCAG          |
|  |              |          | R3 | 0  | 160936 | 0        | F: <b>AGTGGTCA</b> GAGTAGATGGCAGGAGAAAA<br>R: CTCATAAGTCCAATGCCAG        |
|  |              | OT-C3-5  | R1 | 0  | 233549 | 0        | F: <b>ACAGTG</b> TTCTTCTGATAGTGCTACTG<br>R: CACTTAAAAAAACGTAATGTTAC      |
|  |              |          | R2 | 0  | 82100  | 0        | F: <b>ACAGTG</b> TTCTTCTGATAGTGCTACTG<br>R: CACTTAAAAAAACGTAATGTTAC      |
|  |              |          | R3 | 0  | 21259  | 0        | F: <b>ACCACTGT</b> TTCTTCTGATAGTGCTACTG<br>R: CACTTAAAAAAACGTAATGTTAC    |
|  |              | OT-C3-6  | R1 | 2  | 321599 | 6.22E-06 | F: <b>TAATCGG</b> CTTCTCTTATCTTTTCTAC<br>R: CTTTTTTTTTCTGTAGACC          |
|  |              |          | R2 | 0  | 41659  | 0        | F: <b>TAATCGG</b> CTTCTCTTATCTTTTCTAC<br>R: CTTTTTTTTTCTGTAGACC          |
|  |              |          | R3 | 3  | 87336  | 3.44E-05 | F: <b>ACATTGGC</b> GCTTCTCTTATCTTTTCTAC<br>R: CTTTTTTTTTCTGTAGACC        |
|  |              | OT-C3-7  | R1 | 38 | 655325 | 5.8E-05  | F: <b>CAGATC</b> GTGTAGTGGAAGAGAGCTGG<br>R: ATGTATGTGTAATTGTGAG          |
|  |              |          | R2 | 2  | 12494  | 0.00016  | F: <b>CAGATC</b> GTGTAGTGGAAGAGAGCTGG<br>R: ATGTATGTGTAATTGTGAG          |
|  |              |          | R3 | 0  | 129345 | 0        | F: <b>CAGATCTG</b> GTGTAGTGGAAGAGAGCTGG<br>R: ATGTATGTGTAATTGTGAG        |
|  |              | OT-C3-8  | R1 | 0  | 428306 | 0        | F: <b>ACTTGA</b> ATATAATACTGTATTGGGCTTGG<br>R: GTTACCTTTAGCTTCTCTAG      |
|  |              |          | R2 | 2  | 48158  | 4.15E-05 | F: <b>ACTTGA</b> ATATAATACTGTATTGGGCTTGG<br>R: GTTACCTTTAGCTTCTCTAG      |
|  |              |          | R3 | 0  | 53203  | 0        | F: <b>CATCAAGT</b> ATATAATACTGTATTGGGCTTGG<br>R: GTTACCTTTAGCTTCTCTAG    |
|  |              | OT-C3-9  | R1 | 1  | 130109 | 7.69E-06 | F: <b>GATCAG</b> TAGCTACCTCAACCGCCAAC<br>R: TCCATGGTCTATTTGGGTGTC        |
|  |              |          | R2 | 1  | 16324  | 6.13E-05 | F: <b>GATCAG</b> TAGCTACCTCAACCGCCAAC<br>R: TCCATGGTCTATTTGGGTGTC        |
|  |              |          | R3 | 1  | 281781 | 3.55E-06 | F: <b>CGCTGATC</b> TAGCTACCTCAACCGCCAAC<br>R: TCCATGGTCTATTTGGGTGTC      |
|  |              | OT-C3-10 | R1 | 1  | 32969  | 3.03E-05 | F: <b>TACAGCT</b> GAAACCACTTCAAACCTCTCC<br>R: TTGTTTGACGACGACGTTTC       |
|  |              |          | R2 | 0  | 90191  | 0        | F: <b>TACAGCT</b> GAAACCACTTCAAACCTCTCC<br>R: TTGTTTGACGACGACGTTTC       |
|  |              |          | R3 | 5  | 269732 | 1.85E-05 | F: <b>ACAAGCTAT</b> GAAACCACTTCAAACCTCTCC<br>R: TTGTTTGACGACGACGTTTC     |
|  | pC86-C3 leaf | OT-C3-1  | R1 | 0  | 12571  | 0        | F: <b>GACTAGT</b> ATTGCTTTATGTGTGTCTTGGTTTT<br>R: CAATCTGAACCGTCCAAACTTC |
|  |              |          | R2 | 1  | 104907 | 9.53E-06 | F: <b>GTTTCG</b> TTGCTTTATGTGTGTCTTGGTTTT<br>R: CAATCTGAACCGTCCAAACTTC   |

|  |         |    |    |         |          |                                                                         |
|--|---------|----|----|---------|----------|-------------------------------------------------------------------------|
|  |         | R3 | 0  | 26463   | 0        | F: <b>ACGCTCG</b> ATTGCTTTATGTGTGTCTTGTTTT<br>R: CAATCTGAACCGTCCAACTTC  |
|  | OT-C3-2 | R1 | 20 | 1470627 | 1.36E-05 | F: <b>CGTACG</b> ATAGATACTCATACCGCTTC<br>R: GTTAGTGAATGTGAATTTGCTTTT    |
|  |         | R2 | 10 | 136743  | 7.31E-05 | F: <b>CGTACG</b> ATAGATACTCATACCGCTTC<br>R: GTTAGTGAATGTGAATTTGCTTTT    |
|  |         | R3 | 1  | 26565   | 3.76E-05 | F: <b>ACGTATCA</b> ATAGATACTCATACCGCTTC<br>R: GTTAGTGAATGTGAATTTGCTTTT  |
|  | OT-C3-3 | R1 | 1  | 132928  | 7.52E-06 | F: <b>GAGTGG</b> CTCCATATACCCTCATTAGC<br>R: GTTGTTCTGAATAAGGCTGACCAAG   |
|  |         | R2 | 2  | 75945   | 2.63E-05 | F: <b>GAGTGG</b> CTCCATATACCCTCATTAGC<br>R: GTTGTTCTGAATAAGGCTGACCAAG   |
|  |         | R3 | 0  | 71067   | 0        | F: <b>ACTATGCA</b> CTCCATATACCCTCATTAGC<br>R: GTTGTTCTGAATAAGGCTGACCAAG |
|  | OT-C3-4 | R1 | 2  | 438760  | 4.56E-06 | F: <b>GGTAGC</b> GAGTAGATGGCAGGAGAAAA<br>R: CTCATAAGTCCAATGCCAG         |
|  |         | R2 | 0  | 155860  | 0        | F: <b>GGTAGC</b> GAGTAGATGGCAGGAGAAAA<br>R: CTCATAAGTCCAATGCCAG         |
|  |         | R3 | 0  | 65204   | 0        | F: <b>AGAGTCAA</b> GAGTAGATGGCAGGAGAAAA<br>R: CTCATAAGTCCAATGCCAG       |
|  | OT-C3-5 | R1 | 0  | 165144  | 0        | F: <b>ACTGAT</b> TTCTTCTGATAGTGTCACTG<br>R: CACTTAAAAAACGTAATGTTAC      |
|  |         | R2 | 2  | 121345  | 1.65E-05 | F: <b>ACTGAT</b> TTCTTCTGATAGTGTCACTG<br>R: CACTTAAAAAACGTAATGTTAC      |
|  |         | R3 | 0  | 82031   | 0        | F: <b>AGATCGC</b> ATTCTTCTGATAGTGTCACTG<br>R: CACTTAAAAAACGTAATGTTAC    |
|  | OT-C3-6 | R1 | 2  | 869497  | 2.3E-06  | F: <b>ATGAGC</b> GCTTCTCTTATCTTTTCTAC<br>R: CTTTTTTTTTCTGTAGACC         |
|  |         | R2 | 1  | 97175   | 1.03E-05 | F: <b>ATGAGC</b> GCTTCTCTTATCTTTTCTAC<br>R: CTTTTTTTTTCTGTAGACC         |
|  |         | R3 | 1  | 101866  | 9.82E-06 | F: <b>AGCAGGAA</b> GCTTCTCTTATCTTTTCTAC<br>R: CTTTTTTTTTCTGTAGACC       |
|  | OT-C3-7 | R1 | 56 | 1021602 | 5.48E-05 | F: <b>ATTCCT</b> GTGTAGTGGAAGAGAGCTGG<br>R: ATGTATGTGAAATTGTGAG         |
|  |         | R2 | 0  | 86113   | 0        | F: <b>ATTCCT</b> GTGTAGTGGAAGAGAGCTGG<br>R: ATGTATGTGAAATTGTGAG         |
|  |         | R3 | 1  | 52823   | 1.89E-05 | F: <b>AGTCACTA</b> GTGTAGTGGAAGAGAGCTGG<br>R: ATGTATGTGAAATTGTGAG       |
|  | OT-C3-8 | R1 | 0  | 173719  | 0        | F: <b>CAAAG</b> ATATAAATACTGTATTGGGCTTGG<br>R: GTTACCTTTAGCTTCTCTAG     |
|  |         | R2 | 0  | 5858    | 0        | F: <b>CAAAG</b> ATATAAATACTGTATTGGGCTTGG<br>R: GTTACCTTTAGCTTCTCTAG     |
|  |         | R3 | 0  | 19138   | 0        | F: <b>ATCCTGTA</b> ATATAAATACTGTATTGGGCTTGG<br>R: GTTACCTTTAGCTTCTCTAG  |



|                                 |          |    |        |          |                                                                       |                                                                         |
|---------------------------------|----------|----|--------|----------|-----------------------------------------------------------------------|-------------------------------------------------------------------------|
| pC86-C3<br>floral<br>structures | OT-C3-9  | R1 | 2      | 54886    | 3.64E-05                                                              | F: <b>CAACT</b> TAGCTACCTCAACCGCCAAC<br>R: TCCATGGTCTATTTGGGTGTC        |
|                                 |          | R2 | 0      | 20697    | 0                                                                     | F: <b>CAACT</b> TAGCTACCTCAACCGCCAAC<br>R: TCCATGGTCTATTTGGGTGTC        |
|                                 |          | R3 | 3      | 228724   | 1.31E-05                                                              | F: <b>AACTCACCT</b> TAGCTACCTCAACCGCCAAC<br>R: TCCATGGTCTATTTGGGTGTC    |
|                                 | OT-C3-10 | R1 | 0      | 34189    | 0                                                                     | F: <b>CACCGG</b> TGAAACCACTTCAAACCTCTCC<br>R: TTGTTTGACGACGACGTTTC      |
|                                 |          | R2 | 0      | 35319    | 0                                                                     | F: <b>CACCGG</b> TGAAACCACTTCAAACCTCTCC<br>R: TTGTTTGACGACGACGTTTC      |
|                                 |          | R3 | 2      | 296920   | 6.74E-06                                                              | F: <b>CAACCACAT</b> TGAAACCACTTCAAACCTCTCC<br>R: TTGTTTGACGACGACGTTTC   |
|                                 | OT-C3-1  | R1 | 3      | 16966    | 0.00017                                                               | F: <b>AACGTGAT</b> TTGCTTTATGTGTGTCTTGTTTT<br>R: CAATCTGAACCGTCCAAACTTC |
|                                 |          | R2 | 2      | 125692   | 1.59E-05                                                              | F: <b>ATCACG</b> TTGCTTTATGTGTGTCTTGTTTT<br>R: CAATCTGAACCGTCCAAACTTC   |
|                                 |          | R3 | 0      | 80020    | 0                                                                     | F: <b>AACGTGAT</b> TTGCTTTATGTGTGTCTTGTTTT<br>R: CAATCTGAACCGTCCAAACTTC |
|                                 | OT-C3-2  | R1 | 3      | 259474   | 1.16E-05                                                              | F: <b>CGATGT</b> TATAGATACTCATACCGCTTC<br>R: GTTAGTGAATGTGAATTTGCTTTT   |
|                                 |          | R2 | 22     | 122748   | 0.00018                                                               | F: <b>CGATGT</b> TATAGATACTCATACCGCTTC<br>R: GTTAGTGAATGTGAATTTGCTTTT   |
|                                 |          | R3 | 0      | 76531    | 0                                                                     | F: <b>AAACATCG</b> TATAGATACTCATACCGCTTC<br>R: GTTAGTGAATGTGAATTTGCTTTT |
|                                 | OT-C3-3  | R1 | 0      | 93771    | 0                                                                     | F: <b>TTAGGC</b> CTCCATATACCCTCATTAGC<br>R: GTTGTTCTGAATAAGGCTGACCAAG   |
|                                 |          | R2 | 0      | 39079    | 0                                                                     | F: <b>TTAGGC</b> CTCCATATACCCTCATTAGC<br>R: GTTGTTCTGAATAAGGCTGACCAAG   |
|                                 |          | R3 | 1      | 103622   | 9.65E-06                                                              | F: <b>ATGCCTAA</b> CTCCATATACCCTCATTAGC<br>R: GTTGTTCTGAATAAGGCTGACCAAG |
| OT-C3-4                         | R1       | 1  | 361689 | 2.76E-06 | F: <b>TGACCA</b> GAGTAGATGGCAGGAGAAAA<br>R: CTCATAAGTCCAATGCCAG       |                                                                         |
|                                 | R2       | 5  | 112351 | 4.45E-05 | F: <b>TGACCA</b> GAGTAGATGGCAGGAGAAAA<br>R: CTCATAAGTCCAATGCCAG       |                                                                         |
|                                 | R3       | 1  | 102784 | 9.73E-06 | F: <b>AGTGGTCA</b> GAGTAGATGGCAGGAGAAAA<br>R: CTCATAAGTCCAATGCCAG     |                                                                         |
| OT-C3-5                         | R1       | 0  | 55107  | 0        | F: <b>ACAGTG</b> TTCTTCTGATAGTGTCACTG<br>R: CACTTAAAAAAACGTAATGTTAC   |                                                                         |
|                                 | R2       | 2  | 25991  | 7.69E-05 | F: <b>ACAGTG</b> TTCTTCTGATAGTGTCACTG<br>R: CACTTAAAAAAACGTAATGTTAC   |                                                                         |
|                                 | R3       | 0  | 11946  | 0        | F: <b>ACCACTGT</b> TTCTTCTGATAGTGTCACTG<br>R: CACTTAAAAAAACGTAATGTTAC |                                                                         |
| OT-C3-6                         | R1       | 0  | 62128  | 0        | F: <b>TAATCG</b> GCTTCTCTTATCTTTTCTAC<br>R: CTTTTTTTTTCTGTAGACC       |                                                                         |

|    |   |                       |              |         |        |          |                                                                         |          |                                                                          |
|----|---|-----------------------|--------------|---------|--------|----------|-------------------------------------------------------------------------|----------|--------------------------------------------------------------------------|
|    |   |                       | R2           | 1       | 27875  | 3.59E-05 | F: <b>TAATCGG</b> CTTCTCTTATCTTTTCTAC<br>R: CTTTTTTTTTCTGTAGACC         |          |                                                                          |
|    |   |                       | R3           | 2       | 111170 | 1.8E-05  | F: <b>ACATTGGC</b> GCTTCTCTTATCTTTTCTAC<br>R: CTTTTTTTTTCTGTAGACC       |          |                                                                          |
|    |   | OT-C3-7               | R1           | 31      | 562000 | 5.52E-05 | F: <b>CAGATC</b> GTGTAGTGAAGAGAGCTGG<br>R: ATGTATGTGTAATTGTGAG          |          |                                                                          |
|    |   |                       | R2           | 1       | 176916 | 5.65E-06 | F: <b>CAGATC</b> GTGTAGTGAAGAGAGCTGG<br>R: ATGTATGTGTAATTGTGAG          |          |                                                                          |
|    |   |                       | R3           | 1       | 76410  | 1.31E-05 | F: <b>CAGATCTG</b> GTGTAGTGAAGAGAGCTGG<br>R: ATGTATGTGTAATTGTGAG        |          |                                                                          |
|    |   | OT-C3-8               | R1           | 1       | 342936 | 2.92E-06 | F: <b>ACTTGA</b> ATATAATACTGTATTGGGCTTGG<br>R: GTTACCTTTAGCTTCTCTAG     |          |                                                                          |
|    |   |                       | R2           | 1       | 92118  | 1.09E-05 | F: <b>ACTTGA</b> ATATAATACTGTATTGGGCTTGG<br>R: GTTACCTTTAGCTTCTCTAG     |          |                                                                          |
|    |   |                       | R3           | 0       | 14696  | 0        | F: <b>CATCAAGT</b> ATATAATACTGTATTGGGCTTGG<br>R: GTTACCTTTAGCTTCTCTAG   |          |                                                                          |
|    |   | OT-C3-9               | R1           | 2       | 103172 | 1.94E-05 | F: <b>GATCAG</b> TAGCTACCTCAACCGCCAAC<br>R: TCCATGGTCTATTTGGGTGTC       |          |                                                                          |
|    |   |                       | R2           | 0       | 50235  | 0        | F: <b>GATCAG</b> TAGCTACCTCAACCGCCAAC<br>R: TCCATGGTCTATTTGGGTGTC       |          |                                                                          |
|    |   |                       | R3           | 1       | 65866  | 1.52E-05 | F: <b>CGCTGATC</b> TAGCTACCTCAACCGCCAAC<br>R: TCCATGGTCTATTTGGGTGTC     |          |                                                                          |
|    |   | OT-C3-10              | R1           | 1       | 16993  | 5.88E-05 | F: <b>TACAGT</b> GAAACCACTTCAAACCTCTCC<br>R: TTGTTTGACGACGACGTTTC       |          |                                                                          |
|    |   |                       | R2           | 0       | 52218  | 0        | F: <b>TACAGT</b> GAAACCACTTCAAACCTCTCC<br>R: TTGTTTGACGACGACGTTTC       |          |                                                                          |
|    |   |                       | R3           | 0       | 52840  | 0        | F: <b>ACAAGCTA</b> TGAAACCACTTCAAACCTCTCC<br>R: TTGTTTGACGACGACGTTTC    |          |                                                                          |
|    |   | After virus infection | pV86-C3 leaf | OT-C3-1 | R1     | 1        | 264290                                                                  | 3.78E-06 | F: <b>GTTTCG</b> TTGCTTTATGTGTGTCTTGGTTTT<br>R: CAATCTGAACCGTCCAAACTTC   |
|    |   |                       |              |         | R2     | 4        | 67680                                                                   | 5.91E-05 | F: <b>CGACTGG</b> ATTGCTTTATGTGTGTCTTGGTTTT<br>R: CAATCTGAACCGTCCAAACTTC |
|    |   |                       |              |         | R3     | 3        | 66400                                                                   | 4.52E-05 | F: <b>TATCAGC</b> ATTGCTTTATGTGTGTCTTGGTTTT<br>R: CAATCTGAACCGTCCAAACTTC |
|    |   |                       |              | OT-C3-2 | R1     | 3        | 91649                                                                   | 3.27E-05 | F: <b>CGTACG</b> ATAGATACTCATACCGCTTC<br>R: GTTAGTGAATGTGAATTTGCTTTT     |
|    |   |                       |              |         | R2     | 3        | 40189                                                                   | 7.46E-05 | F: <b>CGCATA</b> CAATAGATACTCATACCGCTTC<br>R: GTTAGTGAATGTGAATTTGCTTTT   |
|    |   |                       |              |         | R3     | 4        | 28637                                                                   | 0.00014  | F: <b>CGTACG</b> ATAGATACTCATACCGCTTC<br>R: GTTAGTGAATGTGAATTTGCTTTT     |
|    |   |                       |              | OT-C3-3 | R1     | 0        | 100687                                                                  | 0        | F: <b>GAGTGG</b> CTCCATATACCCTCATTAGC<br>R: GTTGTTCTGAATAAGGCTGACCAAG    |
| R2 | 3 |                       |              |         | 71760  | 4.18E-05 | F: <b>CTCAATG</b> ACTCCATATACCCTCATTAGC<br>R: GTTGTTCTGAATAAGGCTGACCAAG |          |                                                                          |

|  |          |    |    |        |          |                                                                       |                                                                         |
|--|----------|----|----|--------|----------|-----------------------------------------------------------------------|-------------------------------------------------------------------------|
|  |          |    | R3 | 6      | 85626    | 7.01E-05                                                              | F: <b>TCTTCACA</b> CTCCATATACCCTCATTAGC<br>R: GTTGTTCTGAATAAGGCTGACCAAG |
|  | OT-C3-4  | R1 | 1  | 128030 | 7.81E-06 | F: <b>GGTAGC</b> GAGTAGATGGCAGGAGAAAA<br>R: CTCATAAGTCCAATGCCAG       |                                                                         |
|  |          | R2 | 7  | 71201  | 9.83E-05 | F: <b>CTGAGCC</b> AAGTAGATGGCAGGAGAAAA<br>R: CTCATAAGTCCAATGCCAG      |                                                                         |
|  |          | R3 | 2  | 59546  | 3.36E-05 | F: <b>TGAAGAGA</b> GAGTAGATGGCAGGAGAAAA<br>R: CTCATAAGTCCAATGCCAG     |                                                                         |
|  | OT-C3-5  | R1 | 0  | 6697   | 0        | F: <b>ACTGAT</b> TCTTCTGATAGTGTCACTG<br>R: CACTTAAAAAAACGTAATGTTAC    |                                                                         |
|  |          | R2 | 0  | 67905  | 0        | F: <b>CTGGCATA</b> TCTTCTGATAGTGTCACTG<br>R: CACTTAAAAAAACGTAATGTTAC  |                                                                         |
|  |          | R3 | 2  | 46306  | 4.32E-05 | F: <b>TGGAACA</b> AATCTTCTGATAGTGTCACTG<br>R: CACTTAAAAAAACGTAATGTTAC |                                                                         |
|  | OT-C3-6  | R1 | 1  | 103394 | 9.67E-06 | F: <b>ATGAGC</b> GCTTCTTATCTTTTCTAC<br>R: CTTTTTTTTTCTGTAGACC         |                                                                         |
|  |          | R2 | 0  | 63669  | 0        | F: <b>GAATCT</b> GAGCTTCTTATCTTTTCTAC<br>R: CTTTTTTTTTCTGTAGACC       |                                                                         |
|  |          | R3 | 0  | 69604  | 0        | F: <b>TGGCTT</b> CAGCTTCTTATCTTTTCTAC<br>R: CTTTTTTTTTCTGTAGACC       |                                                                         |
|  | OT-C3-7  | R1 | 8  | 135723 | 5.89E-05 | F: <b>ATTCCT</b> GTGTAGTGGAAGAGAGCTGG<br>R: ATGTATGTGAAATTGTGAG       |                                                                         |
|  |          | R2 | 0  | 136431 | 0        | F: <b>CAAGACT</b> AGTGAGTGGAAGAGAGCTGG<br>R: ATGTATGTGAAATTGTGAG      |                                                                         |
|  |          | R3 | 0  | 44781  | 0        | F: <b>TGGTGG</b> TAGTGAGTGGAAGAGAGCTGG<br>R: ATGTATGTGAAATTGTGAG      |                                                                         |
|  | OT-C3-8  | R1 | 0  | 32144  | 0        | F: <b>CAAAAG</b> ATATAACTGTATTGGGCTTGG<br>R: GTTACCTTTAGCTTCTCTAG     |                                                                         |
|  |          | R2 | 1  | 94892  | 1.05E-05 | F: <b>GAGCTGAA</b> ATATAACTGTATTGGGCTTGG<br>R: GTTACCTTTAGCTTCTCTAG   |                                                                         |
|  |          | R3 | 0  | 85475  | 0        | F: <b>TTCACG</b> CAATATAACTGTATTGGGCTTGG<br>R: GTTACCTTTAGCTTCTCTAG   |                                                                         |
|  | OT-C3-9  | R1 | 0  | 22422  | 0        | F: <b>CAACTA</b> TAGCTACCTCAACCGCCAAC<br>R: TCCATGGTCTATTTGGGTGTC     |                                                                         |
|  |          | R2 | 0  | 51825  | 0        | F: <b>GATAGAC</b> ATAGCTACCTCAACCGCCAAC<br>R: TCCATGGTCTATTTGGGTGTC   |                                                                         |
|  |          | R3 | 0  | 54777  | 0        | F: <b>AACTACC</b> TAGCTACCTCAACCGCCAAC<br>R: TCCATGGTCTATTTGGGTGTC    |                                                                         |
|  | OT-C3-10 | R1 | 0  | 17407  | 0        | F: <b>CACCGG</b> TGAAACCACTCAAACCTTCC<br>R: TTGTTTGACGACGACGTTTC      |                                                                         |
|  |          | R2 | 2  | 63133  | 3.17E-05 | F: <b>GCCACATA</b> TGAAACCACTCAAACCTTCC<br>R: TTGTTTGACGACGACGTTTC    |                                                                         |
|  |          | R3 | 1  | 74383  | 1.34E-05 | F: <b>AAGAGAT</b> CTGAAACCACTCAAACCTTCC<br>R: TTGTTTGACGACGACGTTTC    |                                                                         |

|                                 |         |    |    |        |          |                                                                          |
|---------------------------------|---------|----|----|--------|----------|--------------------------------------------------------------------------|
| pV86-C3<br>floral<br>structures | OT-C3-1 | R1 | 1  | 238214 | 4.2E-06  | F: <b>ATCACG</b> TTGCTTTATGTGTGTCTTGGTTTT<br>R: CAATCTGAACCGTCCAAACTTC   |
|                                 |         | R2 | 10 | 61964  | 0.00016  | F: <b>GACTAGT</b> ATTGCTTTATGTGTGTCTTGGTTTT<br>R: CAATCTGAACCGTCCAAACTTC |
|                                 |         | R3 | 4  | 65989  | 6.06E-05 | F: <b>GCGAGTAA</b> TTGCTTTATGTGTGTCTTGGTTTT<br>R: CAATCTGAACCGTCCAAACTTC |
|                                 | OT-C3-2 | R1 | 3  | 246290 | 1.22E-05 | F: <b>CGATGT</b> ATAGATACTCATACCGCTTC<br>R: GTTAGTGAATGTGAATTTGCTTTT     |
|                                 |         | R2 | 0  | 36317  | 0        | F: <b>CAATGGAA</b> ATAGATACTCATACCGCTTC<br>R: GTTAGTGAATGTGAATTTGCTTTT   |
|                                 |         | R3 | 2  | 74311  | 2.69E-05 | F: <b>GCTAACGA</b> ATAGATACTCATACCGCTTC<br>R: GTTAGTGAATGTGAATTTGCTTTT   |
|                                 | OT-C3-3 | R1 | 0  | 65255  | 0        | F: <b>TTAGGC</b> CTCCATATACCCTCATTAGC<br>R: GTTGTTCTGAATAAGGCTGACCAAG    |
|                                 |         | R2 | 4  | 90566  | 4.42E-05 | F: <b>CACTTCGA</b> CTCCATATACCCTCATTAGC<br>R: GTTGTTCTGAATAAGGCTGACCAAG  |
|                                 |         | R3 | 5  | 117086 | 4.27E-05 | F: <b>GCTCGGTA</b> CTCCATATACCCTCATTAGC<br>R: GTTGTTCTGAATAAGGCTGACCAAG  |
|                                 | OT-C3-4 | R1 | 0  | 130602 | 0        | F: <b>TGACCA</b> GAGTAGATGGCAGGAGAAAA<br>R: CTCATAAGTCCAATGCCAG          |
|                                 |         | R2 | 0  | 69962  | 0        | F: <b>CAGCGTTA</b> GAGTAGATGGCAGGAGAAAA<br>R: CTCATAAGTCCAATGCCAG        |
|                                 |         | R3 | 1  | 119863 | 8.34E-06 | F: <b>GGAGAACA</b> GAGTAGATGGCAGGAGAAAA<br>R: CTCATAAGTCCAATGCCAG        |
|                                 | OT-C3-5 | R1 | 0  | 108358 | 0        | F: <b>ACAGTG</b> TTCTTCTGATAGTGTCACTG<br>R: CACTTAAAAAAACGTAATGTTAC      |
|                                 |         | R2 | 0  | 56972  | 0        | F: <b>CATACCA</b> ATTCTTCTGATAGTGTCACTG<br>R: CACTTAAAAAAACGTAATGTTAC    |
|                                 |         | R3 | 0  | 62863  | 0        | F: <b>GGTGCGAA</b> TTCTTCTGATAGTGTCACTG<br>R: CACTTAAAAAAACGTAATGTTAC    |
|                                 | OT-C3-6 | R1 | 0  | 115349 | 0        | F: <b>TAATCGG</b> CTTCTTATCTTTTCTAC<br>R: CTTTTTTTTTCTGTAGACC            |
|                                 |         | R2 | 2  | 103209 | 1.94E-05 | F: <b>CCAGTTC</b> AGCTTCTTATCTTTTCTAC<br>R: CTTTTTTTTTCTGTAGACC          |
|                                 |         | R3 | 1  | 130208 | 7.68E-06 | F: <b>GTACGCA</b> AGCTTCTTATCTTTTCTAC<br>R: CTTTTTTTTTCTGTAGACC          |
|                                 | OT-C3-7 | R1 | 8  | 198508 | 4.03E-05 | F: <b>CAGATC</b> GTGTAGTGGAAGAGAGCTGG<br>R: ATGTATGTGTAATTGTGAG          |
|                                 |         | R2 | 0  | 62510  | 0        | F: <b>CCGAAGT</b> AGTGTAGTGGAAGAGAGCTGG<br>R: ATGTATGTGTAATTGTGAG        |
|                                 |         | R3 | 4  | 25455  | 0.00016  | F: <b>GTCGTAG</b> AGTGTAGTGGAAGAGAGCTGG<br>R: ATGTATGTGTAATTGTGAG        |
|                                 | OT-C3-8 | R1 | 2  | 123402 | 1.62E-05 | F: <b>ACTTGA</b> ATATAATACTGTATTGGGCTTGG<br>R: GTTACCTTTAGCTTCTCTAG      |

|                 |         |          |    |        |          |                                                                         |                                                                        |
|-----------------|---------|----------|----|--------|----------|-------------------------------------------------------------------------|------------------------------------------------------------------------|
|                 |         |          | R2 | 0      | 6768     | 0                                                                       | F: <b>CCGTGAGA</b> ATATAAATACTGTATTGGGCTTGG<br>R: GTTACCTTTAGCTTCTCTAG |
|                 |         |          | R3 | 0      | 26279    | 0                                                                       | F: <b>GTCTGTCA</b> ATATAAATACTGTATTGGGCTTGG<br>R: GTTACCTTTAGCTTCTCTAG |
|                 |         | OT-C3-9  | R1 | 2      | 48476    | 4.13E-05                                                                | F: <b>GATCAG</b> TAGCTACCTCAACCGCCAAC<br>R: TCCATGGTCTATTTGGGTGTC      |
|                 |         |          | R2 | 4      | 254278   | 1.57E-05                                                                | F: <b>GATCAG</b> TAGCTACCTCAACCGCCAAC<br>R: TCCATGGTCTATTTGGGTGTC      |
|                 |         |          | R3 | 3      | 81444    | 3.68E-05                                                                | F: <b>GTGTTCTA</b> TAGCTACCTCAACCGCCAAC<br>R: TCCATGGTCTATTTGGGTGTC    |
|                 |         | OT-C3-10 | R1 | 0      | 14703    | 0                                                                       | F: <b>TACAGCT</b> GAAACCACTTCAAACCTCTCC<br>R: TTGTTTGACGACGACGTTTC     |
|                 |         |          | R2 | 1      | 271767   | 3.68E-06                                                                | F: <b>CGAACTTAT</b> GAAACCACTTCAAACCTCTCC<br>R: TTGTTTGACGACGACGTTTC   |
|                 |         |          | R3 | 9      | 73245    | 0.00012                                                                 | F: <b>TAGGATGAT</b> GAAACCACTTCAAACCTCTCC<br>R: TTGTTTGACGACGACGTTTC   |
| pC86-C3<br>leaf | OT-C3-1 | R1       | 1  | 166305 | 6.01E-06 | F: <b>GTTTCG</b> TTGCTTTATGTGTGTCTTGTTTT<br>R: CAATCTGAACCGTCCAAACTTC   |                                                                        |
|                 |         | R2       | 10 | 105609 | 9.47E-05 | F: <b>CGACTGGA</b> TTGCTTTATGTGTGTCTTGTTTT<br>R: CAATCTGAACCGTCCAAACTTC |                                                                        |
|                 |         | R3       | 4  | 46162  | 8.67E-05 | F: <b>TATCAGCA</b> TTGCTTTATGTGTGTCTTGTTTT<br>R: CAATCTGAACCGTCCAAACTTC |                                                                        |
|                 | OT-C3-2 | R1       | 3  | 91946  | 3.26E-05 | F: <b>CGTACG</b> ATAGATACTCATACCGCTTC<br>R: GTTAGTGAATGTGAATTTGCTTTT    |                                                                        |
|                 |         | R2       | 8  | 106344 | 7.52E-05 | F: <b>CGCATA</b> CAATAGATACTCATACCGCTTC<br>R: GTTAGTGAATGTGAATTTGCTTTT  |                                                                        |
|                 |         | R3       | 0  | 13321  | 0        | F: <b>GCTAACGA</b> ATAGATACTCATACCGCTTC<br>R: GTTAGTGAATGTGAATTTGCTTTT  |                                                                        |
|                 | OT-C3-3 | R1       | 1  | 106603 | 9.38E-06 | F: <b>GAGTGG</b> CTCCATATACCCTCATTAGC<br>R: GTTGTTCTGAATAAGGCTGACCAAG   |                                                                        |
|                 |         | R2       | 1  | 162675 | 6.15E-06 | F: <b>CTCAATGA</b> CTCCATATACCCTCATTAGC<br>R: GTTGTTCTGAATAAGGCTGACCAAG |                                                                        |
|                 |         | R3       | 0  | 53057  | 0        | F: <b>TCTTCACA</b> CTCCATATACCCTCATTAGC<br>R: GTTGTTCTGAATAAGGCTGACCAAG |                                                                        |
|                 | OT-C3-4 | R1       | 1  | 147228 | 6.79E-06 | F: <b>GGTAGC</b> GAGTAGATGGCAGGAGAAAA<br>R: CTCATAAGTCCAATGCCAG         |                                                                        |
|                 |         | R2       | 0  | 94656  | 0        | F: <b>CTGAGCC</b> AAGTAGATGGCAGGAGAAAA<br>R: CTCATAAGTCCAATGCCAG        |                                                                        |
|                 |         | R3       | 0  | 57359  | 0        | F: <b>TGAAGAGA</b> GAGTAGATGGCAGGAGAAAA<br>R: CTCATAAGTCCAATGCCAG       |                                                                        |
|                 | OT-C3-5 | R1       | 0  | 37232  | 0        | F: <b>ACTGAT</b> TTCTTCTGATAGTGTCACTG<br>R: CACTTAAAAAACGTAATGTTAC      |                                                                        |
|                 |         | R2       | 0  | 53098  | 0        | F: <b>CTGGCATA</b> TTCTTCTGATAGTGTCACTG<br>R: CACTTAAAAAACGTAATGTTAC    |                                                                        |

|  |                                 |          |         |    |        |          |                                                                       |                                                                         |
|--|---------------------------------|----------|---------|----|--------|----------|-----------------------------------------------------------------------|-------------------------------------------------------------------------|
|  |                                 |          | R3      | 2  | 46306  | 4.32E-05 | F: <b>TGGAACA</b> ATTCTTCTGATAGTGTCACTG<br>R: CACTTAAAAAACGTAATGTTAC  |                                                                         |
|  |                                 | OT-C3-6  | R1      | 0  | 104079 | 0        | F: <b>ATGAGC</b> GCTTCTTATCTTTTCTAC<br>R: CTTTTTTTTTCTGTAGACC         |                                                                         |
|  |                                 |          | R2      | 0  | 384679 | 0        | F: <b>ACATTGGC</b> GCTTCTTATCTTTTCTAC<br>R: CTTTTTTTTTCTGTAGACC       |                                                                         |
|  |                                 |          | R3      | 0  | 69604  | 0        | F: <b>TGGCTTC</b> AGCTTCTTATCTTTTCTAC<br>R: CTTTTTTTTTCTGTAGACC       |                                                                         |
|  |                                 | OT-C3-7  | R1      | 35 | 224709 | 0.00016  | F: <b>ATTCCT</b> GTGTAGTGGAAGAGAGCTGG<br>R: ATGTATGTGTAATTGTGAG       |                                                                         |
|  |                                 |          | R2      | 0  | 95776  | 0        | F: <b>CAAGACTA</b> GTGTAGTGGAAGAGAGCTGG<br>R: ATGTATGTGTAATTGTGAG     |                                                                         |
|  |                                 |          | R3      | 0  | 6201   | 0        | F: <b>TGGTGGT</b> AGGTAGTGGAAGAGAGCTGG<br>R: ATGTATGTGTAATTGTGAG      |                                                                         |
|  |                                 | OT-C3-8  | R1      | 0  | 68204  | 0        | F: <b>CAAAA</b> GATATAATACTGTATTGGGCTTGG<br>R: GTTACCTTTAGCTTCTCTAG   |                                                                         |
|  |                                 |          | R2      | 0  | 30943  | 0        | F: <b>GAGCTGAA</b> ATATAATACTGTATTGGGCTTGG<br>R: GTTACCTTTAGCTTCTCTAG |                                                                         |
|  |                                 |          | R3      | 1  | 17235  | 5.8E-05  | F: <b>TTCACGC</b> AATATAATACTGTATTGGGCTTGG<br>R: GTTACCTTTAGCTTCTCTAG |                                                                         |
|  |                                 | OT-C3-9  | R1      | 0  | 22642  | 0        | F: <b>CAACTA</b> TAGCTACCTCAACCGCCAAC<br>R: TCCATGGTCTATTTGGGTGTC     |                                                                         |
|  |                                 |          | R2      | 5  | 60134  | 8.31E-05 | F: <b>GATAGACA</b> TAGCTACCTCAACCGCCAAC<br>R: TCCATGGTCTATTTGGGTGTC   |                                                                         |
|  |                                 |          | R3      | 2  | 61165  | 3.27E-05 | F: <b>AACTCACC</b> TAGCTACCTCAACCGCCAAC<br>R: TCCATGGTCTATTTGGGTGTC   |                                                                         |
|  |                                 | OT-C3-10 | R1      | 0  | 11997  | 0        | F: <b>CACCGG</b> TGAAACCACTTCAAACCTCTTCC<br>R: TTGTTTGACGACGACGTTTC   |                                                                         |
|  |                                 |          | R2      | 0  | 46252  | 0        | F: <b>GCCACATA</b> TGAAACCACTTCAAACCTCTTCC<br>R: TTGTTTGACGACGACGTTTC |                                                                         |
|  |                                 |          | R3      | 1  | 31127  | 3.21E-05 | F: <b>AAGAGATC</b> TGAAACCACTTCAAACCTCTTCC<br>R: TTGTTTGACGACGACGTTTC |                                                                         |
|  | pC86-C3<br>floral<br>structures | OT-C3-1  | R1      | 1  | 193662 | 5.16E-06 | F: <b>ATCACG</b> TTGCTTTATGTGTGTCTTGTTTT<br>R: CAATCTGAACCGTCCAAACTTC |                                                                         |
|  |                                 |          |         | R2 | 6      | 97054    | 6.18E-05                                                              | F: <b>GACTAGT</b> ATTGCTTTATGTGTGTCTTGTTTT<br>R: CAATCTGAACCGTCCAAACTTC |
|  |                                 |          |         | R3 | 0      | 41752    | 0                                                                     | F: <b>GCGAGTAA</b> TTGCTTTATGTGTGTCTTGTTTT<br>R: CAATCTGAACCGTCCAAACTTC |
|  |                                 |          | OT-C3-2 | R1 | 3      | 246290   | 1.22E-05                                                              | F: <b>CGATGT</b> ATAGATACTCATACCGCTTC<br>R: GTTAGTGAATGTGAATTTGCTTTT    |
|  |                                 |          |         | R2 | 18     | 106051   | 0.00017                                                               | F: <b>CAATGGAA</b> ATAGATACTCATACCGCTTC<br>R: GTTAGTGAATGTGAATTTGCTTTT  |
|  |                                 |          |         | R3 | 20     | 74467    | 0.00027                                                               | F: <b>GCTAACGA</b> ATAGATACTCATACCGCTTC<br>R: GTTAGTGAATGTGAATTTGCTTTT  |

|  |  |          |    |    |        |          |                                                                        |
|--|--|----------|----|----|--------|----------|------------------------------------------------------------------------|
|  |  | OT-C3-3  | R1 | 1  | 50958  | 1.96E-05 | F: <b>TTAGGC</b> CTCCATATACCCTCATTAGC<br>R: GTTGTCTGAATAAGGCTGACCAAG   |
|  |  |          | R2 | 4  | 127493 | 3.14E-05 | F: <b>CACTTCG</b> ACTCCATATACCCTCATTAGC<br>R: GTTGTCTGAATAAGGCTGACCAAG |
|  |  |          | R3 | 13 | 78476  | 0.00017  | F: <b>GCTCGG</b> TACTCCATATACCCTCATTAGC<br>R: GTTGTCTGAATAAGGCTGACCAAG |
|  |  | OT-C3-4  | R1 | 5  | 107216 | 4.66E-05 | F: <b>TGACCA</b> GAGTAGATGGCAGGAGAAAA<br>R: CTCATAAGTCCAATGCCAG        |
|  |  |          | R2 | 0  | 101778 | 0        | F: <b>CAGCGT</b> TAGAGTAGATGGCAGGAGAAAA<br>R: CTCATAAGTCCAATGCCAG      |
|  |  |          | R3 | 0  | 80273  | 0        | F: <b>GGAGAACA</b> GAGTAGATGGCAGGAGAAAA<br>R: CTCATAAGTCCAATGCCAG      |
|  |  | OT-C3-5  | R1 | 0  | 86842  | 0        | F: <b>ACAGTG</b> TTCTTCTGATAGTGTCACTG<br>R: CACTTAAAAAACGTAATGTTAC     |
|  |  |          | R2 | 0  | 13552  | 0        | F: <b>CATACCA</b> TTCTTCTGATAGTGTCACTG<br>R: CACTTAAAAAACGTAATGTTAC    |
|  |  |          | R3 | 0  | 83766  | 0        | F: <b>GGTGC</b> GAATTCTTCTGATAGTGTCACTG<br>R: CACTTAAAAAACGTAATGTTAC   |
|  |  | OT-C3-6  | R1 | 0  | 79098  | 0        | F: <b>TAATCG</b> GCTTCTTATCTTTTCTAC<br>R: CTTTTTTTTTCTGTAGACC          |
|  |  |          | R2 | 1  | 68376  | 1.46E-05 | F: <b>CCAGTTC</b> AGCTTCTTATCTTTTCTAC<br>R: CTTTTTTTTTCTGTAGACC        |
|  |  |          | R3 | 0  | 39787  | 0        | F: <b>GTACGCA</b> AGCTTCTTATCTTTTCTAC<br>R: CTTTTTTTTTCTGTAGACC        |
|  |  | OT-C3-7  | R1 | 1  | 76908  | 1.3E-05  | F: <b>CAGATC</b> GTGTAGTGGAAGAGAGCTGG<br>R: ATGTATGTGAAATTGTGAG        |
|  |  |          | R2 | 2  | 476678 | 4.2E-06  | F: <b>AGTCACT</b> AGGTAGTGGAAGAGAGCTGG<br>R: ATGTATGTGAAATTGTGAG       |
|  |  |          | R3 | 0  | 106829 | 0        | F: <b>GTCGTAG</b> AGGTAGTGGAAGAGAGCTGG<br>R: ATGTATGTGAAATTGTGAG       |
|  |  | OT-C3-8  | R1 | 0  | 117542 | 0        | F: <b>ACTTGA</b> ATATAATACTGTATTGGGCTTGG<br>R: GTTACCTTTAGCTTCTCTAG    |
|  |  |          | R2 | 0  | 48835  | 0        | F: <b>CCGTGAGA</b> ATATAATACTGTATTGGGCTTGG<br>R: GTTACCTTTAGCTTCTCTAG  |
|  |  |          | R3 | 0  | 38560  | 0        | F: <b>GTCTGTCA</b> ATATAATACTGTATTGGGCTTGG<br>R: GTTACCTTTAGCTTCTCTAG  |
|  |  | OT-C3-9  | R1 | 0  | 41127  | 0        | F: <b>GATCAG</b> TAGCTACCTCAACCGCCAAC<br>R: TCCATGGTCTATTTGGGTGTC      |
|  |  |          | R2 | 1  | 250275 | 4E-06    | F: <b>CCTCTG</b> ATAGCTACCTCAACCGCCAAC<br>R: TCCATGGTCTATTTGGGTGTC     |
|  |  |          | R3 | 1  | 57396  | 1.74E-05 | F: <b>GTGTTCT</b> ATAGCTACCTCAACCGCCAAC<br>R: TCCATGGTCTATTTGGGTGTC    |
|  |  | OT-C3-10 | R1 | 0  | 10139  | 0        | F: <b>TACAGC</b> TGAAACCACTTCAAACCTCTCC<br>R: TTGTTTGACGACGACGTTTC     |

|         |         |    |    |        |          |                                                                          |                                                                       |
|---------|---------|----|----|--------|----------|--------------------------------------------------------------------------|-----------------------------------------------------------------------|
|         |         |    | R2 | 3      | 171847   | 1.75E-05                                                                 | F: <b>TACAGCT</b> GAAACCACTTCAAACCTCTTCC<br>R: TTGTTTGACGACGACGTTTC   |
|         |         |    | R3 | 0      | 23296    | 0                                                                        | F: <b>TAGGATGAT</b> GAAACCACTTCAAACCTCTTCC<br>R: TTGTTTGACGACGACGTTTC |
| WT leaf | OT-C3-1 | R1 | 1  | 79026  | 1.27E-05 | F: <b>AACGTGAT</b> TTGCTTTATGTGTGTCTTGGTTTT<br>R: CAATCTGAACCGTCCAAACTTC |                                                                       |
|         |         | R2 | 18 | 101590 | 0.00018  | F: <b>GTTTCG</b> TTGCTTTATGTGTGTCTTGGTTTT<br>R: CAATCTGAACCGTCCAAACTTC   |                                                                       |
|         |         | R3 | 6  | 101912 | 5.89E-05 | F: <b>ACGCTCG</b> ATTGCTTTATGTGTGTCTTGGTTTT<br>R: CAATCTGAACCGTCCAAACTTC |                                                                       |
|         | OT-C3-2 | R1 | 3  | 91946  | 3.26E-05 | F: <b>AAACATCG</b> ATAGATACTCATACCGCTTC<br>R: GTTAGTGAATGTGAATTTGCTTTT   |                                                                       |
|         |         | R2 | 0  | 46115  | 0        | F: <b>CGTACG</b> ATAGATACTCATACCGCTTC<br>R: GTTAGTGAATGTGAATTTGCTTTT     |                                                                       |
|         |         | R3 | 6  | 23916  | 0.00026  | F: <b>CGATGT</b> ATAGATACTCATACCGCTTC<br>R: GTTAGTGAATGTGAATTTGCTTTT     |                                                                       |
|         | OT-C3-3 | R1 | 2  | 142901 | 1.4E-05  | F: <b>ATGCCTA</b> ACTCCATATACCCTCATTAGC<br>R: GTTGTTCTGAATAAGGCTGACCAAG  |                                                                       |
|         |         | R2 | 1  | 98368  | 1.02E-05 | F: <b>GAGTGG</b> CTCCATATACCCTCATTAGC<br>R: GTTGTTCTGAATAAGGCTGACCAAG    |                                                                       |
|         |         | R3 | 14 | 121284 | 0.00011  | F: <b>ACTATGC</b> ACTCCATATACCCTCATTAGC<br>R: GTTGTTCTGAATAAGGCTGACCAAG  |                                                                       |
|         | OT-C3-4 | R1 | 0  | 68768  | 0        | F: <b>AGTGGTC</b> AGAGTAGATGGCAGGAGAAAA<br>R: CTCATAAGTCCAATGCCCAG       |                                                                       |
|         |         | R2 | 2  | 134935 | 1.48E-05 | F: <b>GGTAGC</b> GAGTAGATGGCAGGAGAAAA<br>R: CTCATAAGTCCAATGCCCAG         |                                                                       |
|         |         | R3 | 1  | 130779 | 7.65E-06 | F: <b>AGAGTCA</b> AGAGTAGATGGCAGGAGAAAA<br>R: CTCATAAGTCCAATGCCCAG       |                                                                       |
|         | OT-C3-5 | R1 | 21 | 89767  | 0.00023  | F: <b>ACCACTGT</b> TTCTTCTGATAGTGTCACTG<br>R: CACTTAAAAAAACGTAATGTTAC    |                                                                       |
|         |         | R2 | 1  | 26249  | 3.81E-05 | F: <b>ACTGAT</b> TTCTTCTGATAGTGTCACTG<br>R: CACTTAAAAAAACGTAATGTTAC      |                                                                       |
|         |         | R3 | 2  | 35376  | 5.65E-05 | F: <b>AGATCGC</b> ATTCTTCTGATAGTGTCACTG<br>R: CACTTAAAAAAACGTAATGTTAC    |                                                                       |
|         | OT-C3-6 | R1 | 0  | 68056  | 0        | F: <b>ATGAGC</b> GCTTCTTATCTTTTCTAC<br>R: CTTTTTTTTTCTGTAGACC            |                                                                       |
|         |         | R2 | 5  | 52695  | 9.49E-05 | F: <b>AGCAGGA</b> AGCTTCTTATCTTTTCTAC<br>R: CTTTTTTTTTCTGTAGACC          |                                                                       |
|         |         | R3 | 0  | 138452 | 0        | F: <b>AGCAGGA</b> AGCTTCTTATCTTTTCTAC<br>R: CTTTTTTTTTCTGTAGACC          |                                                                       |
|         | OT-C3-7 | R1 | 0  | 25167  | 0        | F: <b>CAGATCTG</b> GTGTAGTGAAGAGAGCTGG<br>R: ATGTATGTGAAATTGTGAG         |                                                                       |
|         |         | R2 | 0  | 196870 | 0        | F: <b>ATTCCT</b> GTGTAGTGAAGAGAGCTGG<br>R: ATGTATGTGAAATTGTGAG           |                                                                       |



|  |                      |          |         |    |        |          |                                                                             |                                                                                    |
|--|----------------------|----------|---------|----|--------|----------|-----------------------------------------------------------------------------|------------------------------------------------------------------------------------|
|  |                      |          | R3      | 3  | 133414 | 2.25E-05 | F: <b>AGTCACTA</b> GTGTAGTGGAAGAGAGCTGG<br>R: ATGTATGTGTA AATTGTGAG         |                                                                                    |
|  |                      | OT-C3-8  | R1      | 0  | 62682  | 0        | F: <b>CATCAAGT</b> ATATAATACTGTATTGGGCTTGG<br>R: GTTACCTTTAGCTTCTCTAG       |                                                                                    |
|  |                      |          | R2      | 6  | 35186  | 0.00017  | F: <b>CAAAAAG</b> ATATAATACTGTATTGGGCTTGG<br>R: GTTACCTTTAGCTTCTCTAG        |                                                                                    |
|  |                      |          | R3      | 2  | 31151  | 6.42E-05 | F: <b>ATCCTGTA</b> ATATAATACTGTATTGGGCTTGG<br>R: GTTACCTTTAGCTTCTCTAG       |                                                                                    |
|  |                      | OT-C3-9  | R1      | 0  | 87799  | 0        | F: <b>CAACTA</b> TAGCTACCTCAACCGCCAAC<br>R: TCCATGGTCTATTTGGGTGTC           |                                                                                    |
|  |                      |          | R2      | 0  | 28564  | 0        | F: <b>CAACTA</b> TAGCTACCTCAACCGCCAAC<br>R: TCCATGGTCTATTTGGGTGTC           |                                                                                    |
|  |                      |          | R3      | 0  | 86646  | 0        | F: <b>ATTGAGGA</b> TAGCTACCTCAACCGCCAAC<br>R: TCCATGGTCTATTTGGGTGTC         |                                                                                    |
|  |                      | OT-C3-10 | R1      | 0  | 13408  | 0        | F: <b>ACAAGCTA</b> TGAAACCACTTCAA AACTCTTCC<br>R: TTGTTTGACGACGACGTTTC      |                                                                                    |
|  |                      |          | R2      | 1  | 109669 | 9.12E-06 | F: <b>CACCGG</b> TGAAACCACTTCAA AACTCTTCC<br>R: TTGTTTGACGACGACGTTTC        |                                                                                    |
|  |                      |          | R3      | 4  | 96370  | 4.15E-05 | F: <b>CAACCACA</b> TGAAACCACTTCAA AACTCTTCC<br>R: TTGTTTGACGACGACGTTTC      |                                                                                    |
|  | WT floral structures | OT-C3-1  | R1      | 4  | 422097 | 9.48E-06 | F: <b>AACGTGAT</b> TTGCTTTATGTGTGTCTTG GTTTT<br>R: CAATCTGAACCGTCCAA AACTTC |                                                                                    |
|  |                      |          |         | R2 | 24     | 167078   | 0.00014                                                                     | F: <b>ATCACG</b> TTGCTTTATGTGTGTCTTG GTTTT<br>R: CAATCTGAACCGTCCAA AACTTC          |
|  |                      |          |         | R3 | 1      | 93120    | 1.07E-05                                                                    | F: <b>AACGTGAT</b> TTGCTTTATGTGTGTCTTG GTTTT<br>R: CAATCTGAACCGTCCAA AACTTC        |
|  |                      |          | OT-C3-2 | R1 | 3      | 246290   | 1.22E-05                                                                    | F: <b>AAACATCG</b> ATAGATACTCATA CCGCTTC<br>R: GTTAGTGAATGTGAATTTGCTTTT            |
|  |                      |          |         | R2 | 0      | 9062     | 0                                                                           | F: <b>CGATGT</b> ATAGATACTCATA CCGCTTC<br>R: GTTAGTGAATGTGAATTTGCTTTT              |
|  |                      |          |         | R3 | 1      | 11834    | 8.45E-05                                                                    | F: <b>CGATGT</b> ATAGATACTCATA CCGCTTC<br>R: GTTAGTGAATGTGAATTTGCTTTT              |
|  |                      |          | OT-C3-3 | R1 | 2      | 151248   | 1.32E-05                                                                    | F: <b>ATGCCTAA</b> CTCCATATA C C C T C A T T A G C<br>R: GTTGTTCTGAATAAGGCTGACCAAG |
|  |                      |          |         | R2 | 2      | 89347    | 2.24E-05                                                                    | F: <b>TTAGGC</b> CTCCATATA C C C T C A T T A G C<br>R: GTTGTTCTGAATAAGGCTGACCAAG   |
|  |                      |          |         | R3 | 8      | 175551   | 4.56E-05                                                                    | F: <b>ATGCCTAA</b> CTCCATATA C C C T C A T T A G C<br>R: GTTGTTCTGAATAAGGCTGACCAAG |
|  |                      |          | OT-C3-4 | R1 | 1      | 128113   | 7.81E-06                                                                    | F: <b>AGTGGTCA</b> GAGTAGATGGCAGGAGAAAA<br>R: CTCATAAGTCCAATGCC CAG                |
|  |                      |          |         | R2 | 0      | 211158   | 0                                                                           | F: <b>TGACCA</b> GAGTAGATGGCAGGAGAAAA<br>R: CTCATAAGTCCAATGCC CAG                  |
|  |                      |          |         | R3 | 0      | 153254   | 0                                                                           | F: <b>AGTGGTCA</b> GAGTAGATGGCAGGAGAAAA<br>R: CTCATAAGTCCAATGCC CAG                |

|  |  |          |    |    |        |          |                                                                       |
|--|--|----------|----|----|--------|----------|-----------------------------------------------------------------------|
|  |  | OT-C3-5  | R1 | 0  | 72929  | 0        | F: <b>ACCACTG</b> TTTCTTCTGATAGTGCACTG<br>R: CACTTAAAAAAACGTAATGTTAC  |
|  |  |          | R2 | 0  | 24856  | 0        | F: <b>ACAGTG</b> TTTCTTCTGATAGTGCACTG<br>R: CACTTAAAAAAACGTAATGTTAC   |
|  |  |          | R3 | 3  | 36167  | 8.29E-05 | F: <b>ACCACTG</b> TTTCTTCTGATAGTGCACTG<br>R: CACTTAAAAAAACGTAATGTTAC  |
|  |  | OT-C3-6  | R1 | 1  | 72557  | 1.38E-05 | F: <b>ACATTGGC</b> GCTTCTTATCTTTTCTAC<br>R: CTTTTTTTTTCTGTAGACC       |
|  |  |          | R2 | 2  | 60363  | 3.31E-05 | F: <b>TAATCGG</b> GCTTCTTATCTTTTCTAC<br>R: CTTTTTTTTTCTGTAGACC        |
|  |  |          | R3 | 1  | 50995  | 1.96E-05 | F: <b>ACATTGGC</b> GCTTCTTATCTTTTCTAC<br>R: CTTTTTTTTTCTGTAGACC       |
|  |  | OT-C3-7  | R1 | 5  | 133637 | 3.74E-05 | F: <b>CAGATCTG</b> GTGTAGTGGAAGAGAGCTGG<br>R: ATGTATGTGTAATTGTGAG     |
|  |  |          | R2 | 3  | 254421 | 1.18E-05 | F: <b>CAGATC</b> GTGTAGTGGAAGAGAGCTGG<br>R: ATGTATGTGTAATTGTGAG       |
|  |  |          | R3 | 3  | 116387 | 2.58E-05 | F: <b>CAGATCTG</b> GTGTAGTGGAAGAGAGCTGG<br>R: ATGTATGTGTAATTGTGAG     |
|  |  | OT-C3-8  | R1 | 0  | 224555 | 0        | F: <b>CATCAAGT</b> ATATAATACTGTATTGGGCTTGG<br>R: GTTACCTTTAGCTTCTCTAG |
|  |  |          | R2 | 12 | 79087  | 0.00015  | F: <b>ACTTGA</b> ATATAATACTGTATTGGGCTTGG<br>R: GTTACCTTTAGCTTCTCTAG   |
|  |  |          | R3 | 8  | 58364  | 0.00014  | F: <b>CATCAAGT</b> ATATAATACTGTATTGGGCTTGG<br>R: GTTACCTTTAGCTTCTCTAG |
|  |  | OT-C3-9  | R1 | 0  | 31493  | 0        | F: <b>CGCTGATC</b> TAGCTACCTCAACCGCCAAC<br>R: TCCATGGTCTATTTGGGTGTC   |
|  |  |          | R2 | 1  | 29276  | 3.42E-05 | F: <b>GATCAG</b> TAGCTACCTCAACCGCCAAC<br>R: TCCATGGTCTATTTGGGTGTC     |
|  |  |          | R3 | 0  | 66318  | 0        | F: <b>CGCTGATC</b> TAGCTACCTCAACCGCCAAC<br>R: TCCATGGTCTATTTGGGTGTC   |
|  |  | OT-C3-10 | R1 | 1  | 27058  | 3.7E-05  | F: <b>ACAAGCT</b> ATGAAACCACTTCAAACCTCTCC<br>R: TTGTTTGACGACGACGTTTC  |
|  |  |          | R2 | 0  | 41680  | 0        | F: <b>TACAGC</b> TGAAACCACTTCAAACCTCTCC<br>R: TTGTTTGACGACGACGTTTC    |
|  |  |          | R3 | 5  | 189043 | 2.64E-05 | F: <b>CACCGG</b> TGAAACCACTTCAAACCTCTCC<br>R: TTGTTTGACGACGACGTTTC    |

<sup>a</sup>The barcodes used for deep sequencing are marked in red.

**Table S6.** Other primers used in this study.

| Primer name   | Primer sequence                           | Application                              |
|---------------|-------------------------------------------|------------------------------------------|
| pV86-GUS-R1-F | GTACCCGGGGATCCTATTGAATCGGGCTCTCTTC        | Construction of pV86-GUS reporter vector |
| pV86-GUS-R1-R | ACGTAACATTGAAAGGTCCCATAAAAGTTC            |                                          |
| pV86-GUS-R2-F | GACCTTTCAATGTTACGTCCTGTAGAAACC            |                                          |
| pV86-GUS-R2-R | GCCTGCAGGTCGACTCGATCTAGTAACATAGATGACACC   |                                          |
| pC86-GUS-R1-F | GTACCCGGGGATCCTAGGAGCTGTTCTAAGGCG         | Construction of pC86-GUS reporter vector |
| pC86-GUS-R1-R | ACGTAACATCATTTATAAGTACATATACATGTAAAAATAAC |                                          |
| pC86-GUS-R2-F | CTTATAAATGATGTTACGTCCTGTAGAAACC           |                                          |
| pC86-GUS-R2-R | CGACGGCCAGTGCCACGATCTAGTAACATAGATGACACC   |                                          |
| pV86-401-F    | GCATGCATTGAATCGGGCTCTCTTC                 | Construction of pV86-401 vector          |
| pV86-401-R    | TCTAGATGAAAGGTCCCATAAAAG                  |                                          |
| pC86-401-F    | GCATGCAGGAGCTGTTCTAAGGCG                  | Construction of pC86-401 vector          |
| pC86-401-R    | TCTAGACATTTATAAGTACATATACATG              |                                          |
| B7-F          | ATTGGGTTTATTGTGAAGAAGAAA                  | B7 sgRNA oligos                          |
| B7-R          | AAACTTTCTTCTCACAATAAACC                   |                                          |
| B15-F         | ATTGTGGGAAGTATGAAGACGTGA                  | B15 sgRNA oligos                         |
| B15-R         | AAACTCACGTCTTCATACTCCCA                   |                                          |
| C3-F          | ATTGAAGAAGTGGTAAAACAATGT                  | C3 sgRNA oligos                          |
| C3-R          | AAACACATTGTTTTACCAGTTCTT                  |                                          |
| C11-F         | ATTGGGTGGTTGATAAAGATCTGG                  | C11 sgRNA oligos                         |
| C11-R         | AAACCCAGATCTTTATCAACCACC                  |                                          |
| BSCTV-B-F     | ATATGTTGGGTGCTGGTGGTATAG                  | Mutation analysis in B7/B15 target site  |
| BSCTV-B-R     | CTGGATCGCACAGGACATTAAGTGG                 |                                          |
| BSCTV-C-F     | GCCTTCGCCTGGATTGCATAATAT                  | Mutation analysis in C3/C11 target site  |
| BSCTV-C-R     | GTCCAGATCCGTAATGCCCGTTA                   |                                          |
| qPCR-BSCTV-F  | CAGGGATTTTCGCACAGAGGAAC                   | qPCR and ddPCR for BSCTV accumulation    |
| qPCR-BSCTV-R  | GATTCGGTACCAAGTCCACGGG                    |                                          |
| qPCR-PPR-F    | CTCGGCCAAGAAGATCAACCATAC                  | qPCR for <i>PPR</i> DNA and RNA level    |
| qPCR-PPR-R    | GGTGCTTTATGTGGTTGTAGTTATGC                |                                          |
| qPCR-Cas9-F   | CACGTTGCGCAGATTCTCGACTC                   | qPCR for <i>Cas9</i> RNA level           |
| qPCR-Cas9-R   | CTCCCGAACCTTGTAGAAGTGGGA                  |                                          |
